# Supplementary material
Source: PubMed Central journal article supplement (PMC7295674)
Supplement: NIHMS1546832-supplement-10653_2019_486_MOESM2_ESM.pdf [file NIHMS1546832-supplement-10653_2019_486_MOESM2_ESM.pdf]

## Consent Form

Please enter the following:

Child's Preschool Name

Last 4 digits of your phone  
number

### Consent to Participate in Research for Parent/Caregiver

**Study Title: Gardenroots: The Nevada City, CA Garden Project**

**Sponsored By: California Breast Cancer Research Program – University of CA**

**Principal Investigators: Monica Ramirez-Andreotta, MPA, PhD (University of Arizona), Joanne Hild, MS (Sierra Streams Institute), Peggy Reynolds, PhD (University of California, San Francisco)**

**This is a consent form for research participation.** It contains important information about the human research part of the study and what to expect if you decide to participate.

#### Why is this study being done?

The goals of this human research are to determine:

- 1) what the outcomes are of research projects that involve members of the public in some or all steps of the scientific method,
- 2) how to successfully report environmental monitoring data back to communities to address environmental health concerns,
- 3) participants' gardening practices in preschools, **and/or**
- 4) what and how much locally grown food is consumed by the family and preschool children.

### **What will happen if I take part in this study?**

As part of this study, you will be asked to complete all or just some of the activities listed below:

- 1) Survey about your child's participation in gardening behavior and consumption patterns
- 2) Participation in environmental sampling of water, soil, dust and produce from your child's preschool garden
- 3) A food frequency questionnaire and 24 hour dietary recall

### **How long will I be in the study?**

- 1) The survey about your child's participation in gardening activities will take about 20 minutes.
- 2) Your participation in environmental sampling in your child's preschool garden will involve a training session of 1-2 hours and approximately 30 minutes collecting garden samples.
- 3) The food frequency questionnaire and 24-hour dietary recall take an average of one hour.

### **How many people will take part in this study?**

Gardenroots in CA will work with up to 30 families.

### **Can I stop being in the study?**

**Your participation is voluntary.** You may refuse to participate in this study, or to participate in any of the aspects of this study. If you decide to take part in the study, you may leave the study at any time. No matter what decision you make, there will be no penalty to you and you will not lose any of your usual benefits. Your decision will not affect your future relationship with The University of Arizona, Sierra Streams Institute or the University of California, San Francisco.

**What risks, side effects or discomforts can I anticipate from being in the study?** There is no expected research-related injury (i.e. physical, psychological, social or otherwise) associated with the human research component of the study.

### **What benefits can I expect from being in the study?**

There are no direct benefits from participation. You may or may not benefit as a result of participating in the human research portion of the study. However, the knowledge gained by this study related to citizen science, environmental health, environmental communication, and individual gardening practices may inform future research studies and community activities and protect human health.

### **What other choices do I have if I do not take part in the study?**

You may choose not to participate in this study without penalty or loss of benefits to which you are otherwise entitled. If you decide you do not want to participate in the human research, you may still participate in the citizen science environmental monitoring portion of the project.

### **What are the costs of taking part in this study?**

Participant – You may have to pay for gas to travel to drop off environmental samples. You may

also have to drive to attend community gatherings and data sharing events. This is the only anticipated cost that you may incur through the participation in the research.

### **Will I be paid for taking part in this study?**

No, you will not be paid for your participation.

### **Will my study-related information be kept confidential?**

Efforts will be made to keep your study-related information confidential. However, there may be circumstances where this information must be released. For example, personal information regarding your participation in this study may be disclosed if required by state law. In this study, any record that includes your name, phone number, street address or email address will be kept in locked filing cabinets and access to these records will be restricted to researchers involved in the study. You will not be identified in any articles or reports written about this project. Data will be retained for future research under IRB review.

*Also, your records may be reviewed by the following groups:*

*The University of Arizona Institutional Review Board*

*California Breast Cancer Research Program – University of CA*

### **Who can answer my questions about the study?**

For questions, concerns, or complaints about the study you may contact any of the study investigators:

Monica Ramirez-Andreotta by phone at 520-621-0091 or by email,

[mdramire@email.arizona.edu](mailto:mdramire@email.arizona.edu).

Joanne Hild by phone at 530-265-6090 or by email, [joannehild@sierrastreamsinstitute.org](mailto:joannehild@sierrastreamsinstitute.org)

Peggy Reynolds by phone at 510-608-5180 or by email, [Peggy.Reynolds@ucsf.edu](mailto:Peggy.Reynolds@ucsf.edu)

If you wish to ask questions about the study or your rights as a research participant to someone other than the researchers or if you wish to voice any problems or concerns you may have about the study, please call the office of the UCSF Institutional Review Board at 415-476-1814.

Institutional Review Boards responsible for human subjects research at The University of Arizona and the University of California, San Francisco reviewed this research project and found it to be acceptable, according to applicable state and federal regulations and University policies designed to protect the rights and welfare of participants in research.

### **Signing the consent form**

I have read (or someone has read to me) this form, and I am aware that I am being asked to participate in a research study. I have had the opportunity to ask questions and have had them answered to my satisfaction. I voluntarily agree to participate in this study.

I am not giving up any legal rights by signing this form. I will be given a copy of this form.

**Printed name of participant**

**Signature of participant**

SIGN HERE

---

clear

**Date (MM/DD/YYYY)**

**Time (XX:XX AM or PM)**

May we contact you again in the future? The data you provide might lead to new research questions.

Yes

No

What is the best way to contact you in the future?

Email

Phone

Mail

## Demographics pt 1

How many preschool-aged children live at home?

In this study, we are interested in the consumption patterns of your preschool-aged children. If you have more than 1 child in preschool, please answer **all** the following questions in this food frequency questionnaire for **one** of them specifically.

How old is the child that will be represented by this FFQ?

Child's school

How would you describe your child's gender?

Which of the following groups does your child MOST identify with? (choose all that apply)

- African-American, Black
- American Indian, Native American, or Alaskan Native
- Asian, Asian-American
- Caribbean Islander
- Latino or Hispanic
- Middle Eastern or Arab
- Native Hawaiian or Other Pacific Islander
- White, Caucasian, European American
- Other (please specify)

What is your home zip code?

What languages do you speak?

Primary

Secondary

What is the highest level of education you have completed (check one)

- Preschool/Kindergarten
- Elementary/Primary School
- Middle/Junior High School

- High/Secondary School
- Some College (less than four years)
- Trade/Technical School/Training Program
- College Degree (Bachelor)
- Post-Graduate Degree (Master/PhD, MD, JD, etc)
- Prefer not to respond

Go to the column that has the number of persons that live in your household. Select the number in the column that represents **less than or equal** to your total household income.

| # of persons in household (# de personas en casa) | 1              | 2              | 3              | 4              | 5              | 6              | 7              | 8+             |
|---------------------------------------------------|----------------|----------------|----------------|----------------|----------------|----------------|----------------|----------------|
| Income (Ingreso) (\$)                             | 15,250         | 17,400         | 20,780         | 25,100         | 29,420         | 33,740         | 38,060         | 42,380         |
|                                                   | 25,400         | 29,000         | 32,650         | 36,250         | 39,150         | 42,050         | 44,950         | 47,850         |
|                                                   | 40,600         | 46,400         | 52,200         | 58,000         | 62,650         | 67,300         | 71,950         | 76,600         |
|                                                   | Above (Más de) |

## Demographics pt 2

Do you prefer to buy your foods from local sources?

- Yes
- No

What is your motivation for buying locally?

- Perceived health benefits
- Concern for product source
- Environmental consciousness
- Perception of lower cost (discounts, bartering, deal-making)
- Food assistance benefits accepted

—

- Freshness and quality of produce
- Product variety
- Clean and safe
- Convenient location
- Camaraderie
- Farmer-consumer relationship
- Support local economy, farmers
- Others

What is your motivation for NOT buying locally?

- Markets do not fit into lifestyle or routine
- Unfamiliarity with experience
- Perception of higher cost (not competitive with other stores)
- Food assistance benefits NOT accepted
- Cash only
- Inconvenient hours and season of operation
- Lack of food variety
- Discomfort with market design/outdoor shopping venues
- Inconvenient location
- Have own garden/farm
- Exclusionary social space
- Lack of racial, ethnic diversity (language barriers)
- Lack of cultural and ethnically diverse produce
- Others

### Demographics pt 3



Approximately what percent of your child's **yearly** consumption of **corn, grains, oats, and rice** were from the following sources? (sum of percentages **must** equal 100)

|                              | Percentage           |
|------------------------------|----------------------|
| Home Grown                   | <input type="text"/> |
| Locally Grown/Food Market    | <input type="text"/> |
| Store (Organically grown)    | <input type="text"/> |
| Store (Conventionally grown) | <input type="text"/> |

Approximately what percent of your child's **yearly** consumption of **fruits and vegetables** were from the following sources? (sum of percentages **must** equal 100)

|                              | Percentage           |
|------------------------------|----------------------|
| Home Grown                   | <input type="text"/> |
| Locally Grown/Food Market    | <input type="text"/> |
| Store (Organically grown)    | <input type="text"/> |
| Store (Conventionally grown) | <input type="text"/> |

Approximately what percent of your child's **yearly** consumption of **meat** (fish, poultry, beef, pork, etc) were from the following sources? (sum of percentages **must** equal 100)

|                            | Percentage           |
|----------------------------|----------------------|
| Home                       | <input type="text"/> |
| Local Farm                 | <input type="text"/> |
| Store (Organically farmed) | <input type="text"/> |

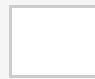

## Asteraceae

In the last 12 months, did your child eat garden lettuce?

- Yes
- No

How often did your child eat garden lettuce?

- 1-6 times per year
- 7-11 times per year
- 1 time per month
- 2-3 times per month
- 1 time per week
- 2 times per week
- 3-4 times per week
- 5-6 times per week
- 1 time per day
- 2 or more times per day

What was your child's usual serving size of garden lettuce?

- Dash or pinch (size of a pea)
- 1 teaspoon (size of a dice)
- 1 tablespoon (size of a poker chip)
- 1 ounce (volume in a shot glass)
- ¼ cup (size of a golf ball)
-

½ cup (size of a tennis ball)

¾ cup (volume in a tea cup)

1 cup (size of a baseball)

In the last 12 months, was the source ever from a **home** or **local garden**?

Yes

No

In the last 12 months, did your child eat romaine lettuce?

Yes

No

How often did your child eat romaine lettuce?

1-6 times per year

7-11 times per year

1 time per month

2-3 times per month

1 time per week

2 times per week

3-4 times per week

5-6 times per week

1 time per day

2 or more times per day

What was your child's usual serving size of romaine lettuce?

Dash or pinch (size of a pea)

- 1 teaspoon (size of a dice)
- 1 tablespoon (size of a poker chip)
- 1 ounce (volume in a shot glass)
- ¼ cup (size of a golf ball)
- ½ cup (size of a tennis ball)
- ¾ cup (volume in a tea cup)
- 1 cup (size of a baseball)

In the last 12 months, was the source ever from a **home** or **local garden**?

- Yes
- No

## **Brassicaceae**

In the last 12 months, did your child eat radish?

- Yes
- No

How often did your child eat radish?

- 1-6 times per year
- 7-11 times per year
- 1 time per month
- 2-3 times per month
- 1 time per week
- 2 times per week
- 3-4 times per week
- 5-6 times per week

- 1 time per day
- 2 or more times per day

What was your child's usual serving size of radish?

- Dash or pinch (size of a pea)
- 1 teaspoon (size of a dice)
- 1 tablespoon (size of a poker chip)
- 1 ounce (volume in a shot glass)
- ¼ cup (size of a golf ball)
- ½ cup (size of a tennis ball)
- ¾ cup (volume in a tea cup)
- 1 cup (size of a baseball)

In the last 12 months, was the source ever from a **home** or **local garden**?

- Yes
- No

In the last 12 months, did your child eat kale?

- Yes
- No

How often did your child eat kale?

- 1-6 times per year
- 7-11 times per year
- 1 time per month
- 2-3 times per month

- 1 time per week
- 2 times per week
- 3-4 times per week
- 5-6 times per week
- 1 time per day
- 2 or more times per day

What was your child's usual serving size of kale?

- Dash or pinch (size of a pea)
- 1 teaspoon (size of a dice)
- 1 tablespoon (size of a poker chip)
- 1 ounce (volume in a shot glass)
- ¼ cup (size of a golf ball)
- ½ cup (size of a tennis ball)
- ¾ cup (volume in a tea cup)
- 1 cup (size of a baseball)

In the last 12 months, was the source ever from a **home** or **local garden**?

- Yes
- No

In the last 12 months, did your child eat broccoli?

- Yes
- No

How often did your child eat broccoli?

- 1-6 times per year
- 7-11 times per year
- 1 time per month
- 2-3 times per month
- 1 time per week
- 2 times per week
- 3-4 times per week
- 5-6 times per week
- 1 time per day
- 2 or more times per day

What was your child's usual serving size of broccoli?

- Dash or pinch (size of a pea)
- 1 teaspoon (size of a dice)
- 1 tablespoon (size of a poker chip)
- 1 ounce (volume in a shot glass)
- ¼ cup (size of a golf ball)
- ½ cup (size of a tennis ball)
- ¾ cup (volume in a tea cup)
- 1 cup (size of a baseball)

In the last 12 months, was the source ever from a **home** or **local garden**?

- Yes
- No

In the last 12 months, did your child eat cabbage?

Yes

No

How often did your child eat cabbage?

1-6 times per year

7-11 times per year

1 time per month

2-3 times per month

1 time per week

2 times per week

3-4 times per week

5-6 times per week

1 time per day

2 or more times per day

What was your child's usual serving size of cabbage?

Dash or pinch (size of a pea)

1 teaspoon (size of a dice)

1 tablespoon (size of a poker chip)

1 ounce (volume in a shot glass)

¼ cup (size of a golf ball)

½ cup (size of a tennis ball)

¾ cup (volume in a tea cup)

1 cup (size of a baseball)

In the last 12 months, was the source ever from a **home** or **local garden**?



Yes

No

In the last 12 months, did your child eat papaya?

Yes

No

How often did your child eat papaya?

1-6 times per year

7-11 times per year

1 time per month

2-3 times per month

1 time per week

2 times per week

3-4 times per week

5-6 times per week

1 time per day

2 or more times per day

What was your child's usual serving size of papaya?

Dash or pinch (size of a pea)

1 teaspoon (size of a dice)

1 tablespoon (size of a poker chip)

1 ounce (volume in a shot glass)

¼ cup (size of a golf ball)

½ cup (size of a tennis ball)

¾ cup (volume in a tea cup)

1 cup (size of a baseball)

In the last 12 months, was the source ever from a **home** or **local garden**?

Yes

No

In the last 12 months, did your child eat turnip?

Yes

No

How often did your child eat turnip?

1-6 times per year

7-11 times per year

1 time per month

2-3 times per month

1 time per week

2 times per week

3-4 times per week

5-6 times per week

1 time per day

2 or more times per day

What was your child's usual serving size of turnip?

Dash or pinch (size of a pea)

1 teaspoon (size of a dice)

- 1 tablespoon (size of a poker chip)
- 1 ounce (volume in a shot glass)
- ¼ cup (size of a golf ball)
- ½ cup (size of a tennis ball)
- ¾ cup (volume in a tea cup)
- 1 cup (size of a baseball)

In the last 12 months, was the source ever from a **home** or **local garden**?

- Yes
- No

In the last 12 months, did your child eat cauliflower?

- Yes
- No

How often did your child eat cauliflower?

- 1-6 times per year
- 7-11 times per year
- 1 time per month
- 2-3 times per month
- 1 time per week
- 2 times per week
- 3-4 times per week
- 5-6 times per week
- 1 time per day
- 2 or more times per day

What was your child's usual serving size of cauliflower?

- Dash or pinch (size of a pea)
- 1 teaspoon (size of a dice)
- 1 tablespoon (size of a poker chip)
- 1 ounce (volume in a shot glass)
- ¼ cup (size of a golf ball)
- ½ cup (size of a tennis ball)
- ¾ cup (volume in a tea cup)
- 1 cup (size of a baseball)

In the last 12 months, was the source ever from a **home** or **local garden**?

- Yes
- No

In the last 12 months, did your child eat arugula?

- Yes
- No

How often did your child eat arugula?

- 1-6 times per year
- 7-11 times per year
- 1 time per month
- 2-3 times per month
- 1 time per week
- 2 times per week

- 3-4 times per week
- 5-6 times per week
- 1 time per day
- 2 or more times per day

What was your child's usual serving size of arugula?

- Dash or pinch (size of a pea)
- 1 teaspoon (size of a dice)
- 1 tablespoon (size of a poker chip)
- 1 ounce (volume in a shot glass)
- ¼ cup (size of a golf ball)
- ½ cup (size of a tennis ball)
- ¾ cup (volume in a tea cup)
- 1 cup (size of a baseball)

In the last 12 months, was the source ever from a **home** or **local garden**?

- Yes
- No

In the last 12 months, did your child eat Brussels sprouts?

- Yes
- No

How often did your child eat Brussels sprouts?

- 1-6 times per year
- 7-11 times per year

- 1 time per month
- 2-3 times per month
- 1 time per week
- 2 times per week
- 3-4 times per week
- 5-6 times per week
- 1 time per day
- 2 or more times per day

What was your child's usual serving size of Brussels sprouts?

- Dash or pinch (size of a pea)
- 1 teaspoon (size of a dice)
- 1 tablespoon (size of a poker chip)
- 1 ounce (volume in a shot glass)
- ¼ cup (size of a golf ball)
- ½ cup (size of a tennis ball)
- ¾ cup (volume in a tea cup)
- 1 cup (size of a baseball)

In the last 12 months, was the source ever from a **home** or **local garden**?

- Yes
- No

## **Amaranthaceae**

In the last 12 months, did your child eat spinach?

- Yes

No

How often did your child eat spinach?

- 1-6 times per year
- 7-11 times per year
- 1 time per month
- 2-3 times per month
- 1 time per week
- 2 times per week
- 3-4 times per week
- 5-6 times per week
- 1 time per day
- 2 or more times per day

What was your child's usual serving size of spinach?

- Dash or pinch (size of a pea)
- 1 teaspoon (size of a dice)
- 1 tablespoon (size of a poker chip)
- 1 ounce (volume in a shot glass)
- ¼ cup (size of a golf ball)
- ½ cup (size of a tennis ball)
- ¾ cup (volume in a tea cup)
- 1 cup (size of a baseball)

In the last 12 months, was the source ever from a **home** or **local garden**?

- Yes
-

No

In the last 12 months, did your child eat Swiss chard?

Yes

No

How often did your child eat Swiss chard?

1-6 times per year

7-11 times per year

1 time per month

2-3 times per month

1 time per week

2 times per week

3-4 times per week

5-6 times per week

1 time per day

2 or more times per day

What was your child's usual serving size of Swiss chard?

Dash or pinch (size of a pea)

1 teaspoon (size of a dice)

1 tablespoon (size of a poker chip)

1 ounce (volume in a shot glass)

¼ cup (size of a golf ball)

½ cup (size of a tennis ball)

¾ cup (volume in a tea cup)



1 cup (size of a baseball)

In the last 12 months, was the source ever from a **home** or **local garden**?

- Yes
- No

## **Cucurbitaceae**

In the last 12 months, did your child eat pumpkin?

- Yes
- No

How often did your child eat pumpkin?

- 1-6 times per year
- 7-11 times per year
- 1 time per month
- 2-3 times per month
- 1 time per week
- 2 times per week
- 3-4 times per week
- 5-6 times per week
- 1 time per day
- 2 or more times per day

What was your child's usual serving size of pumpkin?

- Dash or pinch (size of a pea)
-

- 1 teaspoon (size of a dice)
- 1 tablespoon (size of a poker chip)
- 1 ounce (volume in a shot glass)
- ¼ cup (size of a golf ball)
- ½ cup (size of a tennis ball)
- ¾ cup (volume in a tea cup)
- 1 cup (size of a baseball)

In the last 12 months, was the source ever from a **home** or **local garden**?

- Yes
- No

In the last 12 months, did your child eat squash?

- Yes
- No

How often did your child eat squash?

- 1-6 times per year
- 7-11 times per year
- 1 time per month
- 2-3 times per month
- 1 time per week
- 2 times per week
- 3-4 times per week
- 5-6 times per week
- 1 time per day
-

2 or more times per day

What was your child's usual serving size of squash?

- Dash or pinch (size of a pea)
- 1 teaspoon (size of a dice)
- 1 tablespoon (size of a poker chip)
- 1 ounce (volume in a shot glass)
- ¼ cup (size of a golf ball)
- ½ cup (size of a tennis ball)
- ¾ cup (volume in a tea cup)
- 1 cup (size of a baseball)

In the last 12 months, was the source ever from a **home** or **local garden**?

- Yes
- No

In the last 12 months, did your child eat cucumber?

- Yes
- No

How often did your child eat cucumber?

- 1-6 times per year
- 7-11 times per year
- 1 time per month
- 2-3 times per month
- 1 time per week

- 2 times per week
- 3-4 times per week
- 5-6 times per week
- 1 time per day
- 2 or more times per day

What was your child's usual serving size of cucumber?

- Dash or pinch (size of a pea)
- 1 teaspoon (size of a dice)
- 1 tablespoon (size of a poker chip)
- 1 ounce (volume in a shot glass)
- ¼ cup (size of a golf ball)
- ½ cup (size of a tennis ball)
- ¾ cup (volume in a tea cup)
- 1 cup (size of a baseball)

In the last 12 months, was the source ever from a **home** or **local garden**?

- Yes
- No

In the last 12 months, did your child eat melon?

- Yes
- No

How often did your child eat melon?

-

1-6 times per year

- 7-11 times per year
- 1 time per month
- 2-3 times per month
- 1 time per week
- 2 times per week
- 3-4 times per week
- 5-6 times per week
- 1 time per day
- 2 or more times per day

What was your child's usual serving size of melon?

- Dash or pinch (size of a pea)
- 1 teaspoon (size of a dice)
- 1 tablespoon (size of a poker chip)
- 1 ounce (volume in a shot glass)
- ¼ cup (size of a golf ball)
- ½ cup (size of a tennis ball)
- ¾ cup (volume in a tea cup)
- 1 cup (size of a baseball)

In the last 12 months, was the source ever from a **home** or **local garden**?

- Yes
- No

In the last 12 months, did your child eat zucchini?

-

Yes

No

How often did your child eat zucchini?

1-6 times per year

7-11 times per year

1 time per month

2-3 times per month

1 time per week

2 times per week

3-4 times per week

5-6 times per week

1 time per day

2 or more times per day

What was your child's usual serving size of zucchini?

Dash or pinch (size of a pea)

1 teaspoon (size of a dice)

1 tablespoon (size of a poker chip)

1 ounce (volume in a shot glass)

¼ cup (size of a golf ball)

½ cup (size of a tennis ball)

¾ cup (volume in a tea cup)

1 cup (size of a baseball)

In the last 12 months, was the source ever from a **home** or **local garden**?

Yes

No

## Liliaceae

In the last 12 months, did your child eat garlic?

Yes

No

How often did your child eat garlic?

1-6 times per year

7-11 times per year

1 times per month

2-3 times per month

1 time per week

2 times per week

3-4 times per week

5-6 times per week

1 time per day

2 or more times per day

What was your child's usual serving size of garlic?

1 tablespoon

1/2 tablespoon

1 teaspoon

1/2 teaspoon

1/4 teaspoon

1/8 teaspoon

In the last 12 months, was the source ever from a **home** or **local garden**?

Yes

No

In the last 12 months, did your child eat onions?

Yes

No

How often did your child eat onions?

1-6 times per year

7-11 times per year

1 time per month

2-3 times per month

1 time per week

2 times per week

3-4 times per week

5-6 times per week

1 time per day

2 or more times per day

What was your child's usual serving size of onions?

Dash or pinch (size of a pea)

1 teaspoon (size of a dice)

1 tablespoon (size of a poker chip)



- 1 ounce (volume in a shot glass)
- ¼ cup (size of a golf ball)
- ½ cup (size of a tennis ball)
- ¾ cup (volume in a tea cup)
- 1 cup (size of a baseball)

In the last 12 months, was the source ever from a **home** or **local garden**?

- Yes
- No

## **Solanaceae**

In the last 12 months, did your child eat Irish potatoes (aka Lady Rosetta)?

- Yes
- No

How often did your child eat Irish potatoes?

- 1-6 times per year
- 7-11 times per year
- 1 time per month
- 2-3 times per month
- 1 time per week
- 2 times per week
- 3-4 times per week
- 5-6 times per week
- 1 time per day
- 2 or more times per day

What was your child's usual serving size of Irish potatoes?

- Dash or pinch (size of a pea)
- 1 teaspoon (size of a dice)
- 1 tablespoon (size of a poker chip)
- 1 ounce (volume in a shot glass)
- ¼ cup (size of a golf ball)
- ½ cup (size of a tennis ball)
- ¾ cup (volume in a tea cup)
- 1 cup (size of a baseball)

In the last 12 months, was the source ever from a **home** or **local garden**?

- Yes
- No

In the last 12 months, did your child eat tomatoes?

- Yes
- No

How often did your child eat tomatoes?

- 1-6 times per year
- 7-11 times per year
- 1 time per month
- 2-3 times per month
- 1 time per week
- 2 times per week

- 3-4 times per week
- 5-6 times per week
- 1 time per day
- 2 or more times per day

What was your child's usual serving size of tomatoes?

- Dash or pinch (size of a pea)
- 1 teaspoon (size of a dice)
- 1 tablespoon (size of a poker chip)
- 1 ounce (volume in a shot glass)
- ¼ cup (size of a golf ball)
- ½ cup (size of a tennis ball)
- ¾ cup (volume in a tea cup)
- 1 cup (size of a baseball)

In the last 12 months, was the source ever from a **home** or **local garden**?

- Yes
- No

In the last 12 months, did your child eat eggplant?

- Yes
- No

How often did your child eat eggplant?

- 1-6 times per year
-

7-11 times per year

- 1 time a month
- 2-3 times per month
- 1 time per week
- 2 times per week
- 3-4 times per week
- 5-6 times per week
- 1 time per day
- 2 or more times per day

What was your child's usual serving size of eggplant?

- Dash or pinch (size of a pea)
- 1 teaspoon (size of a dice)
- 1 tablespoon (size of a poker chip)
- 1 ounce (volume in a shot glass)
- ¼ cup (size of a golf ball)
- ½ cup (size of a tennis ball)
- ¾ cup (volume in a tea cup)
- 1 cup (size of a baseball)

In the last 12 months, was the source ever from a **home** or **local garden**?

- Yes
- No

In the last 12 months, did your child eat sweet peppers?

- Yes
-

No

How often did your child eat sweet peppers?

- 1-6 times per year
- 7-11 times per year
- 1 times per month
- 2-3 times per month
- 1 time per week
- 2 times per week
- 3-4 times per week
- 5-6 times per week
- 1 time per day
- 2 or more times per day

What was your child's usual serving size of sweet peppers?

- Dash or pinch (size of a pea)
- 1 teaspoon (size of a dice)
- 1 tablespoon (size of a poker chip)
- 1 ounce (volume in a shot glass)
- ¼ cup (size of a golf ball)
- ½ cup (size of a tennis ball)
- ¾ cup (volume in a tea cup)
- 1 cup (size of a baseball)

In the last 12 months, was the source ever from a **home** or **local garden**?

- Yes
-

No

## Apiaceae

In the last 12 months, did your child eat carrots?

Yes

No

How often did your child eat carrots?

1-6 times per year

7-11 times per year

1 time per month

2-3 times per month

1 time per week

2 times per week

3-4 times per week

5-6 times per week

1 time per day

2 times or more per day

What was your child's usual serving size of carrots?

Dash or pinch (size of a pea)

1 teaspoon (size of a dice)

1 tablespoon (size of a poker chip)

1 ounce (volume in a shot glass)

¼ cup (size of a golf ball)

½ cup (size of a tennis ball)

—

¾ cup (volume in a tea cup)

1 cup (size of a baseball)

In the last 12 months, was the source ever from a **home** or **local garden**?

Yes

No

In the last 12 months, did your child eat celery?

Yes

No

How often did your child eat celery?

1-6 times per year

7-11 times per year

1 time per month

2-3 times per month

1 time per week

2 times per week

3-4 times per week

5-6 times per week

1 time per day

2 or more times per day

What was your child's usual serving size of celery?

Dash or pinch (size of a pea)

1 teaspoon (size of a dice)

- 1 tablespoon (size of a poker chip)
- 1 ounce (volume in a shot glass)
- ¼ cup (size of a golf ball)
- ½ cup (size of a tennis ball)
- ¾ cup (volume in a tea cup)
- 1 cup (size of a baseball)

In the last 12 months, was the source ever from a **home** or **local garden**?

- Yes
- No

In the last 12 months, did your child eat fresh coriander (aka cilantro)?

- Yes
- No

How often did your child eat fresh coriander?

- 1-6 times per year
- 7-11 times per year
- 1 time per month
- 2-3 times per month
- 1 time per week
- 2 times per week
- 3-4 times per week
- 5-6 times per week
- 1 time per day
- 2 times or more per day



What was your child's usual serving size of fresh coriander?

 3 leafs with stems (3 hojas con tallo)

 6 leafs with stems (6 hojas con tallo)

 9 leafs with stems (9 hojas con tallo)

 12 leafs with stems (12 hojas con tallo)

 15 leafs with stems (15 hojas con tallo)

In the last 12 months, was the source ever from a **home** or **local garden**?

Yes

No

## Fabaceae

In the last 12 months, did your child eat kidney beans?

Yes

No

How often did your child eat kidney beans?

1-6 times per year

7-11 times per year

1 time per month

2-3 times per month

1 time per week

2 times per week

-

- 3-4 times per week
- 5-6 times per week
- 1 time per day
- 2 or more times per day

What was your child's usual serving size of kidney beans?

- Dash or pinch (size of a pea)
- 1 teaspoon (size of a dice)
- 1 tablespoon (size of a poker chip)
- 1 ounce (volume in a shot glass)
- ¼ cup (size of a golf ball)
- ½ cup (size of a tennis ball)
- ¾ cup (volume in a tea cup)
- 1 cup (size of a baseball)

In the last 12 months, was the source ever from a **home** or **local garden**?

- Yes
- No

In the last 12 months, did your child eat green beans?

- Yes
- No

How often did your child eat green beans?

- 1-6 times per year
- 7-11 times per year

- 1 time per month
- 2-3 times per month
- 1 time per week
- 2 times per week
- 3-4 times per week
- 5-6 times per week
- 1 time per day
- 2 or more times per day

What was your child's usual serving size of green beans?

- Dash or pinch (size of a pea)
- 1 teaspoon (size of a dice)
- 1 tablespoon (size of a poker chip)
- 1 ounce (volume in a shot glass)
- ¼ cup (size of a golf ball)
- ½ cup (size of a tennis ball)
- ¾ cup (volume in a tea cup)
- 1 cup (size of a baseball)

In the last 12 months, was the source ever from a **home** or **local garden**?

- Yes
- No

In the last 12 months, did your child eat bush beans?

- Yes
- No

How often did your child eat bush beans?

- 1-6 times per year
- 7-11 times per year
- 1 time per month
- 2-3 times per month
- 1 time per week
- 2 times per week
- 3-4 times per week
- 5-6 times per week
- 1 time per day
- 2 or more times per day

What was your child's usual serving size of bush beans?

- Dash or pinch (size of a pea)
- 1 teaspoon (size of a dice)
- 1 tablespoon (size of a poker chip)
- 1 ounce (volume in a shot glass)
- ¼ cup (size of a golf ball)
- ½ cup (size of a tennis ball)
- ¾ cup (volume in a tea cup)
- 1 cup (size of a baseball)

In the last 12 months, was the source ever from a **home** or **local garden**?

- Yes
- No

In the last 12 months, did your child eat peas?

- Yes
- No

How often did your child eat peas?

- 1-6 times per year
- 7-11 times per year
- 1 time per month
- 2-3 times per month
- 1 time per week
- 2 times per week
- 3-4 times per week
- 5-6 times per week
- 1 time per day
- 2 or more times per day

What was your child's usual serving size of peas?

- Dash or pinch (size of a pea)
- 1 teaspoon (size of a dice)
- 1 tablespoon (size of a poker chip)
- 1 ounce (volume in a shot glass)
- ¼ cup (size of a golf ball)
- ½ cup (size of a tennis ball)
- ¾ cup (volume in a tea cup)
- 1 cup (size of a baseball)

In the last 12 months, was the source ever from a **home** or **local garden**?

- Yes
- No

In the last 12 months, did your child eat lima beans?

- Yes
- No

How often did your child eat lima beans?

- 1-6 times per year
- 7-11 times per year
- 1 time per month
- 2-3 times per month
- 1 time per week
- 2 times per week
- 3-4 times per week
- 5-6 times per week
- 1 time per day
- 2 or more times per day

What was your child's usual serving size of lima beans?

- Dash or pinch (size of a pea)
- 1 teaspoon (size of a dice)
- 1 tablespoon (size of a poker chip)
- 1 ounce (volume in a shot glass)
-

$\frac{1}{4}$  cup (size of a golf ball)

$\frac{1}{2}$  cup (size of a tennis ball)

$\frac{3}{4}$  cup (volume in a tea cup)

1 cup (size of a baseball)

In the last 12 months, was the source ever from a **home** or **local garden**?

Yes

No

In the last 12 months, did your child eat lentils?

Yes

No

How often did your child eat lentils?

1-6 times per year

7-11 times per year

1 time per month

2-3 times per month

1 time per week

2 times per week

3-4 times per week

5-6 times per week

1 time per day

2 or more times per day

What was your child's usual serving size of lentils?

- Dash or pinch (size of a pea)
- 1 teaspoon (size of a dice)
- 1 tablespoon (size of a poker chip)
- 1 ounce (volume in a shot glass)
- ¼ cup (size of a golf ball)
- ½ cup (size of a tennis ball)
- ¾ cup (volume in a tea cup)
- 1 cup (size of a baseball)

In the last 12 months, was the source ever from a **home** or **local garden**?

- Yes
- No

In the last 12 months, did your child eat soy beans?

- Yes
- No

How often did your child eat soy beans?

- 1-6 times per year
- 7-11 times per year
- 1 time per month
- 2-3 times per month
- 1 time per week
- 2 times per week
- 3-4 times per week
- 5-6 times per week
-



- 1 time per day
- 2 or more times per day

What was your child's usual serving size of soy beans?

- Dash or pinch (size of a pea)
- 1 teaspoon (size of a dice)
- 1 tablespoon (size of a poker chip)
- 1 ounce (volume in a shot glass)
- ¼ cup (size of a golf ball)
- ½ cup (size of a tennis ball)
- ¾ cup (volume in a tea cup)
- 1 cup (size of a baseball)

In the last 12 months, was the source ever from a **home** or **local garden**?

- Yes
- No

## Lamiaceae

In the last 12 months, did your child eat fresh basil?

- Yes
- No

How often did your child eat fresh basil?

- 1-6 times per year
- 7-11 times per year
-

- 1 time per month
- 2-3 times per month
- 1 time per week
- 2 times per week
- 3-4 times per week
- 5-6 times per week
- 1 time per day
- 2 or more times per day

What was your child's usual serving size of fresh basil?

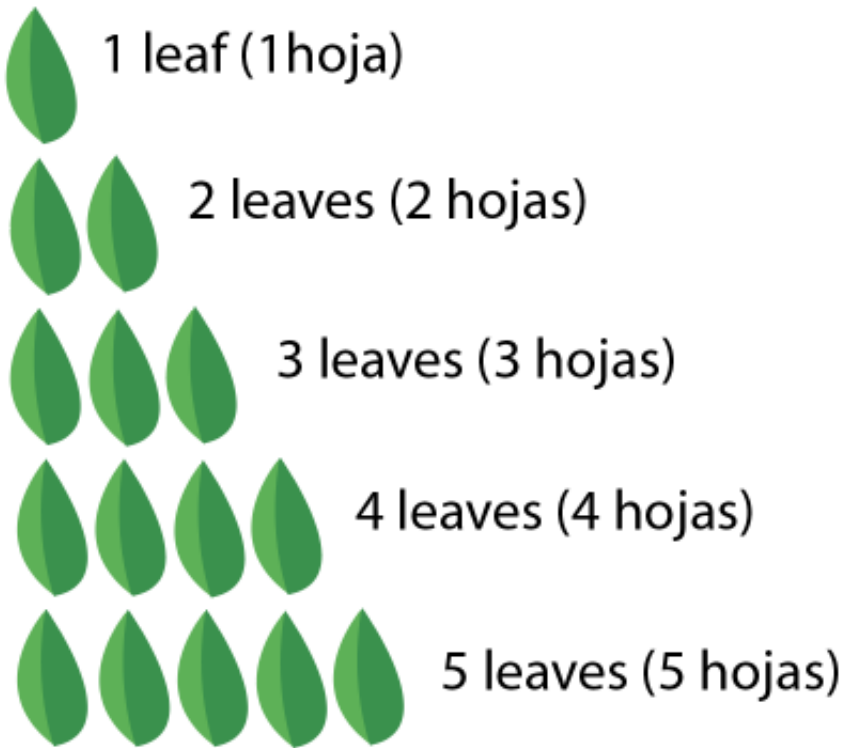

In the last 12 months, was the source ever from a **home** or **local garden**?

- Yes
- No

In the last 12 months, did your child eat fresh mint?

- Yes
- No

How often did your child eat fresh mint?

- 1-6 times per year
- 7-11 times per year
- 1 time per month
- 2-3 times per month
- 1 time per week
- 2 times per week
- 3-4 times per week
- 5-6 times per week
- 1 time per day
- 2 times or more per day

What was your child's usual serving size of mint?

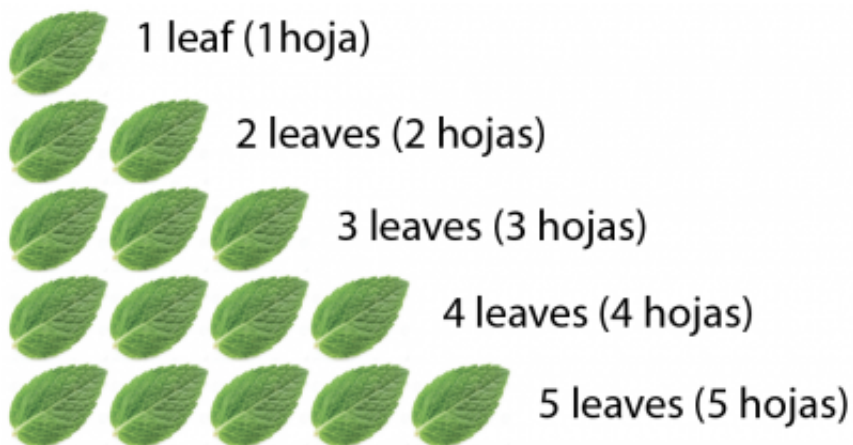

In the last 12 months, was the source ever from a **home** or **local garden**?

Yes

No

## Malvaceae

In the last 12 months, did your child eat okra?

Yes

No

How often did your child eat okra?

1-6 times per year

7-11 times per year

1 time per month

2-3 times per month

1 time per week

2-3 times per week

3-4 times per week

5-6 times per week

1 time per day

2 or more times per day

What was your child's usual serving size of okra?

Dash or pinch (size of a pea)

1 teaspoon (size of a dice)

1 tablespoon (size of a poker chip)

1 ounce (volume in a shot glass)

¼ cup (size of a golf ball)

—

- ½ cup (size of a tennis ball)
- ¾ cup (volume in a tea cup)
- 1 cup (size of a baseball)

In the last 12 months, was the source ever from a **home** or **local garden**?

- Yes
- No

## Rosaceae

In the last 12 months, did your child eat apples?

- Yes
- No

How often did your child eat apples?

- 1-6 times per year
- 7-11 times per year
- 1 time per month
- 2-3 times per month
- 1 time per week
- 2 times per week
- 3-4 times per week
- 5-6 times per week
- 1 time per day
- 2 or more times per day

What was your child's usual serving size of apples?

- Dash or pinch (size of a pea)
- 1 teaspoon (size of a dice)
- 1 tablespoon (size of a poker chip)
- 1 ounce (volume in a shot glass)
- ¼ cup (size of a golf ball)
- ½ cup (size of a tennis ball)
- ¾ cup (volume in a tea cup)
- 1 cup (size of a baseball)

In the last 12 months, was the source ever from **home** or grown **locally**?

- Yes
- No

In the last 12 months, did your child eat strawberries?

- Yes
- No

How often did your child eat strawberries?

- 1-6 times per year
- 7-11 times per year
- 1 time per month
- 2-3 times per month
- 1 time per week
- 2 times per week
- 3-4 times per week
- 5-6 times per week
-

- 1 time per day
- 2 or more times per day

What was your child's usual serving size of strawberries?

- Dash or pinch (size of a pea)
- 1 teaspoon (size of a dice)
- 1 tablespoon (size of a poker chip)
- 1 ounce (volume in a shot glass)
- ¼ cup (size of a golf ball)
- ½ cup (size of a tennis ball)
- ¾ cup (volume in a tea cup)
- 1 cup (size of a baseball)

In the last 12 months, was the source ever from a **home** or **local garden**?

- Yes
- No

## **Convolvulaceae**

In the last 12 months, did your child eat sweet potatoes?

- Yes
- No

How often did your child eat sweet potatoes?

- 1-6 times per year
- 7-11 times per year
-

- 1 time per month
- 2-3 times per month
- 1 time per week
- 2 times per week
- 3-4 times per week
- 5-6 times per week
- 1 time per day
- 2 or more times per day

What was your child's usual serving size of sweet potatoes?

- Dash or pinch (size of a pea)
- 1 teaspoon (size of a dice)
- 1 tablespoon (size of a poker chip)
- 1 ounce (volume in a shot glass)
- ¼ cup (size of a golf ball)
- ½ cup (size of a tennis ball)
- ¾ cup (volume in a tea cup)
- 1 cup (size of a baseball)

In the last 12 months, was the source ever from a **home** or **local garden**?

- Yes
- No

## Poaceae

In the last 12 months, did your child eat corn?

- Yes



No

How often did your child eat corn?

- 1-6 times per year
- 7-11 times per year
- 1 time per month
- 2-3 times per month
- 1 time per week
- 2 times per week
- 3-4 times per week
- 5-6 times per week
- 1 time per day
- 2 or more times per day

What was your child's usual serving size of corn?

- Dash or pinch (size of a pea)
- 1 teaspoon (size of a dice)
- 1 tablespoon (size of a poker chip)
- 1 ounce (volume in a shot glass)
- ¼ cup (size of a golf ball)
- ½ cup (size of a tennis ball)
- ¾ cup (volume in a tea cup)
- 1 cup (size of a baseball)

In the last 12 months, was the source ever grown at **home** or **locally**?

- Yes
-

No

In the last 12 months, did your child eat rice?

Yes

No

How often did your child eat rice?

1-6 times per year

7-11 times per year

1 time per month

2-3 times per month

1 time per week

2 times per week

3-4 times per week

5-6 times per week

1 time per year

2 or more times per year

What was your child's usual serving size of rice?

Dash or pinch (size of a pea)

1 teaspoon (size of a dice)

1 tablespoon (size of a poker chip)

1 ounce (volume in a shot glass)

¼ cup (size of a golf ball)

½ cup (size of a tennis ball)

¾ cup (volume in a tea cup)

1 cup (size of a baseball)

In the last 12 months, was the source ever grown at **home** or **locally**?

- Yes
- No

In the last 12 months, did your child eat rice-based products (for example: rice cereal)

- Yes
- No

Please list and describe the rice-based products your child consumed.

How often did your child eat rice-based products?

- 1-6 times per year
- 7-11 times per year
- 1 time per month
- 2-3 times per month
- 1 time per week
- 2 times per week
- 3-4 times per week
- 5-6 times per week
- 1 time per day
- 2 or more times per day

What was your child's usual serving size of rice-based products?

- Dash or pinch (size of a pea)
- 1 teaspoon (size of a dice)
- 1 tablespoon (size of a poker chip)
- 1 ounce (volume in a shot glass)
- ¼ cup (size of a golf ball)
- ½ cup (size of a tennis ball)
- ¾ cup (volume in a tea cup)
- 1 cup (size of a baseball)

In the last 12 months, was the source ever grown at **home** or **locally**?

- Yes
- No

In the last 12 months, did your child eat gluten-free products that contain the following:

- Quinoa
- Brown rice
- Wild rice
- Buckwheat
- Sorghum
- Tapioca
- Millet
- Amaranth
- Teff
- Arrowroot
-

No

What was your child's usual serving size of gluten-free products?

- Dash or pinch (size of a pea)
- 1 teaspoon (size of a dice)
- 1 tablespoon (size of a poker chip)
- 1 ounce (volume in a shot glass)
- ¼ cup (size of a golf ball)
- ½ cup (size of a tennis ball)
- ¾ cup (volume in a tea cup)
- 1 cup (size of a baseball)

In the last 12 months, was the source ever grown at **home** or **locally**?

- Yes
- No

In the last 12 months, did your child eat whole wheat?

- Yes
- No

How often did your child eat whole wheat?

- 1-6 times per year
- 7-11 times per year
- 1 time per month
- 2-3 times per month
- 1 time per week

- 2 times per week
- 3-4 times per week
- 5-6 times per week
- 1 time per day
- 2 or more times per day

What was your child's usual serving size of whole wheat?

- Dash or pinch (size of a pea)
- 1 teaspoon (size of a dice)
- 1 tablespoon (size of a poker chip)
- 1 ounce (volume in a shot glass)
- ¼ cup (size of a golf ball)
- ½ cup (size of a tennis ball)
- ¾ cup (volume in a tea cup)
- 1 cup (size of a baseball)

In the last 12 months, was the source ever grown at **home** or **locally**?

- Yes
- No

In the last 12 months, did your child eat oats?

- Yes
- No

How often did your child eat oats?

-

1-6 times per year

- 7-11 times per year
- 1 time per month
- 2-3 times per month
- 1 time per week
- 2 times per week
- 3-4 times per week
- 5-6 times per week
- 1 time per day
- 2 or more times per day

What was your child's usual serving size of oats?

- Dash or pinch (size of a pea)
- 1 teaspoon (size of a dice)
- 1 tablespoon (size of a poker chip)
- 1 ounce (volume in a shot glass)
- ¼ cup (size of a golf ball)
- ½ cup (size of a tennis ball)
- ¾ cup (volume in a tea cup)
- 1 cup (size of a baseball)

In the last 12 months, was the source ever grown at **home** or **locally**?

- Yes
- No

## **Selfish and seafood**

In the last 12 months, did your child eat shellfish (scallops, clams, oysters, mussels, crab, lobster)?

- Yes
- No

How often did your child eat shellfish (scallops, clams, oysters, mussels, crab, lobster)?

- 1-6 times per year
- 7-11 times per year
- 1 time per month
- 2-3 times per month
- 1 time per week
- 2 times per week
- 3-4 times per week
- 5-6 times per week
- 1 time per day
- 2 or more times per day

What was your child's usual serving size of shellfish (scallops, clams, oysters, mussels, crab, lobster)?

- Dash or pinch (size of a pea)
- 1 teaspoon (size of a dice)
- 1 tablespoon (size of a poker chip)
- 1 ounce (volume in a shot glass)
- ¼ cup (size of a golf ball)
- ½ cup (size of a tennis ball)
- ¾ cup (volume in a tea cup)



1 cup (size of a baseball)

In the last 12 months, was the source locally caught?

Yes

No

In the last 12 months, did your child eat seaweed/kelp?

Yes

No

How often did your child eat seaweed/kelp?

1-6 times per year

7-11 times per year

1 time per month

2-3 times per month

1 time per week

2 times per week

3-4 times per week

5-6 times per week

1 time per day

2 or more times per day

What was your child's usual serving size of seaweed/kelp?

Dash or pinch (size of a pea)

1 teaspoon (size of a dice)

1 tablespoon (size of a poker chip)

- 1 ounce (volume in a shot glass)
- ¼ cup (size of a golf ball)
- ½ cup (size of a tennis ball)
- ¾ cup (volume in a tea cup)
- 1 cup (size of a baseball)

In the last 12 months, was the source locally caught?

- Yes
- No

## **Baby food**

In the last 12 months, did your child eat organic baby food?

- Yes
- No

How often did your child eat organic baby food?

- 1-6 times per year
- 7-11 times per year
- 1 time per month
- 2-3 times per month
- 1 time per week
- 2 times per week
- 3-4 times per week
- 5-6 times per week
- 1 time per day
- 2 or more times per day

What was your child's usual serving size of organic baby food?

- 1/4 cup = 2 ounces
- 1/2 cup = 4 ounces
- 3/4 cup = 6 ounces
- 1 cup = 8 ounces
- 1 1/4 cups = 10 ounces
- 1 1/2 cups = 12 ounces
- 1 3/4 cups = 14 ounces
- 2 cups = 16 ounces

In the last 12 months, were the source of ingredients for your child's baby food from your home or local garden?

- Yes
- No

## **Apple Juice**

In the last 12 months, did your child drink apple juice?

- Yes
- No

How often did your child drink apple juice?

- NEVER
- 1 time per month or less
- 2-3 times per month

- 1-2 times per week
- 3-4 times per week
- 5-6 times per week
- 1 time per day
- 2-3 times per day
- 4-5 times per day
- 6 or more times per day

What was your child's usual serving size of apple juice?

- 1/4 cup = 2 ounces
- 1/2 cup = 4 ounces
- 3/4 cup = 6 ounces
- 1 cup = 8 ounces
- 1 1/4 cups = 10 ounces
- 1 1/2 cups = 12 ounces
- 1 3/4 cups = 14 ounces
- 2 cups = 16 ounces

## **Water**

Over the past 12 months, how often did your child drink tap water?

- NEVER
- 1 time per month or less
- 2-3 times per month
- 1-2 times per week
- 3-4 times per week
- 5-6 times per week
- 1 time per day

- 2-3 times per day
- 4-5 times per day
- 6 or more times per day

What was your child's usual serving size of water?

- 1/4 cup = 2 ounces
- 1/2 cup = 4 ounces
- 3/4 cup = 6 ounces
- 1 cup = 8 ounces
- 1 1/4 cups = 10 ounces
- 1 1/2 cups = 12 ounces
- 1 3/4 cups = 14 ounces
- 2 cups = 16 ounces

Over the past 12 months, when your child drank tap water, what was the main source?

- Community drinking fountain
- A well or rain water
- A river
- I don't know
- Other

Over the past 12 months, how often did your child drink bottled water?

- NEVER
- 1 time per month or less
-

2-3 times per month

- 1-2 times per week
- 3-4 times per week
- 5-6 times per week
- 1 time per day
- 2-3 times per day
- 4-5 times per day
- 6 or more times per day

## End of Survey Questions

How easy was this food frequency questionnaire to complete?

- |                       |                       |                       |                               |                       |                         |                        |
|-----------------------|-----------------------|-----------------------|-------------------------------|-----------------------|-------------------------|------------------------|
| Extremely<br>easy     | Moderately<br>easy    | Slightly easy         | Neither easy<br>nor difficult | Slightly<br>difficult | Moderately<br>difficult | Extremely<br>difficult |
| <input type="radio"/> | <input type="radio"/> | <input type="radio"/> | <input type="radio"/>         | <input type="radio"/> | <input type="radio"/>   | <input type="radio"/>  |

How likely are you to participate in future dietary assessments?

- |                       |                       |                       |                                |                       |                        |                       |
|-----------------------|-----------------------|-----------------------|--------------------------------|-----------------------|------------------------|-----------------------|
| Extremely<br>likely   | Moderately<br>likely  | Slightly likely       | Neither likely<br>nor unlikely | Slightly<br>unlikely  | Moderately<br>unlikely | Extremely<br>unlikely |
| <input type="radio"/> | <input type="radio"/> | <input type="radio"/> | <input type="radio"/>          | <input type="radio"/> | <input type="radio"/>  | <input type="radio"/> |

## Consent Form

Por favor, escribe lo siguiente:

Nombre de la escuela de  
su hijo

Últimos 4 dígitos de su  
número de teléfono

### Consentimiento para participar en la investigación - Padre / Cuidador

**Título del estudio:** The Nevada City, CA Garden Project Sponsored By: California Breast Cancer Research Program – University of CA

**Investigadora principal:** Monica Ramirez-Andreotta, MPA, PhD (University of Arizona), Joanne Hild, MS (Sierra Streams Institute), Peggy Reynolds, PhD (University of California, San Francisco)

### Este es un formulario de consentimiento para la participación en la investigación.

Contiene información importante sobre la parte de investigación humana del estudio e información sobre qué es lo que puede esperar si decide participar en el estudio.

### ¿Por qué se está haciendo este estudio?

Los objetivos de esta investigación humana son determinar: 1) cuáles son los resultados de los proyectos de investigación que involucran a miembros del público en algunos o todos los pasos del método científico, 2) cómo informar con éxito los datos de monitoreo ambiental a las comunidades para abordar los problemas de salud ambiental, 3) cuales son las prácticas de

jardinería de los participantes en preescolares, y / o 4) qué y cuánta comida cultivada localmente es consumida por la familia y los niños preescolares.

### **¿Qué pasará si participo en este estudio?**

Como parte de este estudio, se le pedirá que complete todas o solo algunas de las actividades enumeradas a continuación:

- 1) Encuesta sobre la participación de su hijo en el comportamiento de jardinería y en los patrones de consumo.
- 2) Participación en el muestreo ambiental de agua, suelo, polvo y productos del jardín/huerta preescolar de su hijo
- 3) Un cuestionario de frecuencia de alimentos y dietario o diario alimenticio de 24 horas.

### **¿Qué pasará si participo en este estudio?**

Como parte de este estudio, se le pedirá que complete todas o solo algunas de las actividades enumeradas a continuación:

- 1) Encuesta sobre la participación de su hijo en el jardín o huerta y en los patrones de consumo.
- 2) Participación en el muestreo ambiental de agua, suelo, polvo y productos del jardín o huerta preescolar de su hijo
- 3) Un cuestionario de frecuencia de alimentos y dietario o diario alimenticio de 24 horas.

### **¿Cuánto tiempo estaré en el estudio?**

- 1) La encuesta sobre la participación de su hijo en actividades de jardinería tomará aproximadamente 20 minutos.
- 2) Su participación en el muestreo ambiental del jardín/huerta preescolar de su hijo implicará una sesión de capacitación de 1 a 2 horas y aproximadamente y 30 minutos de recolección de muestras del jardín/huerta.
- 3) El cuestionario de frecuencia de alimentos y dietario o diario alimenticio toman un promedio de una hora.

### **¿Cuántas personas participarán en este estudio?**

Gardenroots en California trabajará con hasta 30 familias.

### **¿Puedo dejar de estar en el estudio?**

Su participación es voluntaria. Puede negarse a participar en este estudio o a participar en cualquiera de los aspectos de este estudio. Si decide participar en el estudio, puede dejar el estudio en cualquier momento. No importa la decisión que tome, no habrá ninguna sanción para usted y no perderá ninguno de sus beneficios habituales. Su decisión no afectará su relación futura con la Universidad de Arizona, Sierra Streams Institute o la Universidad de



California, San Francisco.

### **¿Qué riesgos, efectos secundarios o molestias puedo anticipar al participar en el estudio?**

No se espera ningún daño relacionado con la investigación (es decir, físico, psicológico, social o de otro tipo) asociado con el componente de investigación humana del estudio.

### **¿Qué beneficios puedo esperar de estar en el estudio?**

No hay beneficios directos de la participación. Puede o no puede beneficiarse como resultado de participar en la parte de investigación humana del estudio. Sin embargo, el conocimiento adquirido por este estudio relacionado con la ciencia ciudadana, la salud ambiental, la comunicación ambiental y las prácticas individuales de jardinería puede informar los estudios de investigación futuros y las actividades de la comunidad y proteger la salud humana.

### **¿Qué otras opciones tengo si no participo en el estudio?**

Puede elegir no participar en este estudio sin penalización o pérdida de beneficios a los que tiene derecho. Si decide que no desea participar en la investigación humana, aún puede participar en la parte de monitoreo ambiental del proyecto de ciencia ciudadana.

### **¿Cuáles son los costos de participar en este estudio?**

Participante: Es posible que tenga que pagar por la gasolina utilizada durante el transporte a la entrega de muestras ambientales. También es posible que deba conducir para asistir a reuniones de la comunidad y eventos de intercambio de datos. Este es el único costo anticipado en el que puede incurrir a través de la participación en la investigación.

### **¿Me pagarán por participar en este estudio?**

No, no se le pagará por su participación.

### **¿Se mantendrá confidencial mi información relacionada con el estudio?**

Se harán esfuerzos para mantener la confidencialidad de su información relacionada con el estudio. Sin embargo, puede haber circunstancias en las que esta información deba ser divulgada. Por ejemplo, la información personal con respecto a su participación en este estudio puede ser divulgada si así lo requiere la ley estatal. En este estudio, cualquier registro que incluya su nombre, número de teléfono, dirección postal o dirección de correo electrónico se guardará en archivadores cerrados con llave y el acceso a estos registros estará restringido a los investigadores involucrados en el estudio. No se le identificará en ningún artículo o informe escrito sobre este proyecto. Los datos se conservarán para futuras investigaciones bajo la revisión de IRB (Junta de Revisión Institucional).

Además, sus registros pueden ser revisados por los siguientes grupos:

### **¿Quién puede responder mis preguntas sobre el estudio?**

Para preguntas, inquietudes o quejas sobre el estudio, puede comunicarse con cualquiera de los investigadores del estudio:

Monica Ramirez-Andreotta por teléfono al 520-621-0091 o email, [dramire@email.arizona.edu](mailto:dramire@email.arizona.edu)

Joanne Hild por teléfono 530-265-6090 o email, [joannehild@sierrastreamsinstitute.org](mailto:joannehild@sierrastreamsinstitute.org)

Peggy Reynolds por teléfono 510-608-5180 o email, [Peggy.Reynolds@ucsf.edu](mailto:Peggy.Reynolds@ucsf.edu)

Si desea hacer preguntas sobre el estudio o sobre sus derechos como participante de una investigación a otra persona que no sea el investigador o si desea expresar cualquier problema o inquietud que pueda tener sobre el estudio, llame a la oficina de la Junta de Revisión Institucional de UCSF al 415-476-1814.

Las Juntas de Revisión Institucional responsables de la investigación de sujetos humanos en la Universidad de Arizona y la Universidad de California en San Francisco revisaron este proyecto de investigación y lo encontraron aceptable, de acuerdo con las regulaciones estatales y federales aplicables y las políticas universitarias diseñadas para proteger los derechos y el bienestar de los Participantes en la investigación.

### **Firmando el formulario de consentimiento**

He leído (o alguien me ha leído) este formulario, y soy consciente de que me piden participar en un estudio de investigación. He tenido la oportunidad de hacer preguntas y he recibido respuestas satisfactorias. Estoy de acuerdo en participar en este estudio voluntariamente. No estoy renunciando a ningún derecho legal al firmar este formulario. Me darán una copia de este formulario.

#### **Nombre de participante**

#### **Firma del participante**

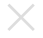

# FIRMAR AQUÍ

[borrar](#)

**Fecha (MM / DD / YYYY)**

**Hora (XX: XX AM o PM)**

¿Podemos estar en contacto con usted en el futuro? Su respuestas pueden conducir nuevas preguntas de investigación.

- Sí
- No

¿Cuál es la mejor manera de contactarte en el futuro?

Correo electrónico

Teléfono

Correo

**Demographics pt 1**

¿Cuántos niños de edad preescolar viven en casa?

En este estudio, estamos interesados en los patrones de consumo de sus niños en edad preescolar.

Si tienes más de 1 hijo en preescolar, responde a las siguientes preguntas en este cuestionario de frecuencia de alimentos para **uno** de ellos.

Cuántos años tiene tu hijo?

La escuela de su hijo

¿Cómo describiría el género de su hijo?

¿Con cuál de los siguientes grupos se identifica su hijo? (elija todo lo que corresponda)

- Afroamericano, negro
- Indio americano, nativo americano o nativo de Alaska
- Asiático, asiático-americano
- Isleño del caribe
- Latino o hispano

- Oriente medio o árabe
- Nativo de Hawai u otra isla del Pacífico
- Blanco, caucásico, europeo americano
- Otros (especifica)

¿Cuál es el código postal de tu casa?

¿Qué idiomas hablas usted?

Primario

Secundario

¿Cuál es el nivel más alto de educación que has completado (marque uno)?

- Preescolar / Kindergarten
- Primaria / primaria
- Secundaria / secundaria
- Escuela secundaria / secundaria
- Un poco de universidad (menos de cuatro años)
- Escuela comercial / técnica / programa de entrenamiento
- Título universitario (Licenciatura)
- Posgrado (Masteria / PhD, MD, JD, etc.)
- Prefiero no responder

¿Cuántas personas viven en su casa? Seleccione el número en la columna que represente **menos o igual** al ingreso total de su casa.

| # of persons in household (# de personas en casa) | 1              | 2              | 3              | 4              | 5              | 6              | 7              | 8+             |
|---------------------------------------------------|----------------|----------------|----------------|----------------|----------------|----------------|----------------|----------------|
| Income (Ingreso) (\$)                             | 15,250         | 17,400         | 20,780         | 25,100         | 29,420         | 33,740         | 38,060         | 42,380         |
|                                                   | 25,400         | 29,000         | 32,650         | 36,250         | 39,150         | 42,050         | 44,950         | 47,850         |
|                                                   | 40,600         | 46,400         | 52,200         | 58,000         | 62,650         | 67,300         | 71,950         | 76,600         |
|                                                   | Above (Más de) |

## Demographics pt 2

¿Prefieres comprar sus vegetales de mercados de agricultores locales?

- Sí
- No

¿Cuál es tu motivación para comprar localmente?

- Beneficios de salud percibidos
- Preocupación por la origen del producto
- Conciencia ambiental
- Percepción de menor costo (descuentos, trueque, tratos)
- Beneficios de asistencia alimental aceptados
- Frescura y calidad del producto
- Variedad de producto
- Limpio y seguro
- Ubicacion conveniente
- Camaradería
- Relación de agricultor-consumidor
- Apoyar la economía local o los agricultores

Otros

¿Cuál es tu motivación para NO comprar localmente?

- Los mercados no encajan en el estilo de vida o la rutina
- Desconocimiento con la experiencia
- Percepción de mayor costo (no competitivo con otras tiendas)
- No se aceptan beneficios de asistencia alimental
- Solamente efectivo
- Horas incómodas y temporada de operación
- Falta de variedad de comida
- Malestia con el diseño del mercado / lugares de compras al aire libre
- Ubicación incómoda
- Tienes su propio jardín / granja
- Espacio social excluyente
- Falta de diversidad racial, étnica (barreras del idioma)
- Falta de productos culturales y étnicamente diversos
- Otros

### Demographics pt 3

Aproximadamente, ¿qué porcentaje del consumo **anual** de **maíz, granos, avena y arroz** de su hijo vino de las siguientes orígenes? (la suma de los porcentajes **debe ser** igual a 100)

|                      | Porcentaje           |
|----------------------|----------------------|
| Casa                 | <input type="text"/> |
| Cultivado localmente | <input type="text"/> |

|                                      |                      |
|--------------------------------------|----------------------|
| / Mercado de agricultores            | <input type="text"/> |
| Tienda (cultivada orgánicamente)     | <input type="text"/> |
| Tienda (cultivada convencionalmente) | <input type="text"/> |

¿Aproximadamente qué porcentaje del consumo **anual** de **frutas y verduras** de su hijo vino de las siguientes orígenes? (la suma de los porcentajes **debe ser** igual a 100)

|                                             | Porcentaje           |
|---------------------------------------------|----------------------|
| Casa                                        | <input type="text"/> |
| Cultivado localmente / Mercado de alimentos | <input type="text"/> |
| Tienda (cultivada orgánicamente)            | <input type="text"/> |
| Tienda (cultivada convencionalmente)        | <input type="text"/> |

¿Aproximadamente qué porcentaje del consumo **anual** de **carne** de su hijo (pescado, pollo, carne de res, cerdo, etc.) vino de las siguientes orígenes? (la suma de los porcentajes **debe ser** igual a 100)

|                                      | Porcentaje           |
|--------------------------------------|----------------------|
| Casa                                 | <input type="text"/> |
| Granja local                         | <input type="text"/> |
| Tienda (cultivada orgánicamente)     | <input type="text"/> |
| Tienda (cultivada convencionalmente) | <input type="text"/> |



## Asteraceae

En los últimos 12 meses, ¿comió lechuga su hijo?

- Sí
- No

¿Con qué frecuencia comió lechuga su hijo?

- 1-6 veces al año
- 7-11 veces al año
- 1 vez por mes
- 2-3 veces al mes
- 1 vez por semana
- 2 veces por semana
- 3-4 veces por semana
- 5-6 veces por semana
- 1 vez por día
- 2 o más veces al día

¿Cuál fue el tamaño de porción habitual de lechuga de su hijo?

- Dash o pellizco (tamaño de un guisante)
- 1 cucharadita (tamaño de un dado)
- 1 cucharada (tamaño de una ficha de póker)
- 1 onza (volumen de un vasito para tragos)
- ¼ de taza (tamaño de una pelota de golf)
- ½ de taza (tamaño de una pelota de tenis)
- ¾ de taza (volumen en una taza de té)
-

1 taza (tamaño de una pelota de béisbol)

En los últimos 12 meses, ¿alguna vez originó de un casa o **jardín local**?

- Sí
- No

En los últimos 12 meses, ¿comió su hijo lechuga romana?

- Sí
- No

¿Con qué frecuencia comió su hijo lechuga romana?

- 1-6 veces al año
- 7-11 veces al año
- 1 vez por mes
- 2-3 veces al mes
- 1 vez por semana
- 2 veces por semana
- 3-4 veces por semana
- 5-6 veces por semana
- 1 vez por día
- 2 o más veces al día

¿Cuál fue el tamaño de porción habitual de lechuga romana de su hijo?

- Dash o pellizco (tamaño de un guisante)
- 1 cucharadita (tamaño de un dado)
- 1 cucharada (tamaño de una ficha de póker)

- 1 onza (volumen de un vasito para tragos)
- ¼ de taza (tamaño de una pelota de golf)
- ½ de taza (tamaño de una pelota de tenis)
- ¾ de taza (volumen en una taza de té)
- 1 taza (tamaño de una pelota de béisbol)

En los últimos 12 meses, ¿alguna vez originó de un casa o **jardín local**?

- Sí
- No

### **Brassicaceae**

En los últimos 12 meses, ¿comió rábano su hijo?

- Sí
- No

¿Con qué frecuencia comió rábano su hijo?

- 1-6 veces al año
- 7-11 veces al año
- 1 vez por mes
- 2-3 veces al mes
- 1 vez por semana
- 2 veces por semana
- 3-4 veces por semana
- 5-6 veces por semana
- 1 vez por día
- 2 o más veces al día

¿Cuál fue el tamaño de porción habitual de rábano de su hijo?

- Dash o pellizco (tamaño de un guisante)
- 1 cucharadita (tamaño de un dado)
- 1 cucharada (tamaño de una ficha de póker)
- 1 onza (volumen de un vasito para tragos)
- ¼ de taza (tamaño de una pelota de golf)
- ½ de taza (tamaño de una pelota de tenis)
- ¾ de taza (volumen en una taza de té)
- 1 taza (tamaño de una pelota de béisbol)

En los últimos 12 meses, ¿alguna vez originó de un casa o **jardín local**?

- Sí
- No

En los últimos 12 meses, ¿comió col rizada su hijo?

- Sí
- No

¿Con qué frecuencia comió col rizada su hijo?

- 1-6 veces al año
- 7-11 veces al año
- 1 vez por mes
- 2-3 veces al mes
- 1 vez por semana
- 2 veces por semana

- 3-4 veces por semana
- 5-6 veces por semana
- 1 vez por día
- 2 o más veces al día

¿Cuál fue el tamaño de porción habitual de col rizada de su hijo?

- Dash o pellizco (tamaño de un guisante)
- 1 cucharadita (tamaño de un dado)
- 1 cucharada (tamaño de una ficha de póker)
- 1 onza (volumen de un vasito para tragos)
- ¼ de taza (tamaño de una pelota de golf)
- ½ de taza (tamaño de una pelota de tenis)
- ¾ de taza (volumen en una taza de té)
- 1 taza (tamaño de una pelota de béisbol)

En los últimos 12 meses, ¿alguna vez originó de un casa o **jardín local**?

- Sí
- No

En los últimos 12 meses, ¿comió brócoli su hijo?

- Sí
- No

¿Con qué frecuencia comió brócoli su hijo?

- 1-6 veces al año
-

7-11 veces al año

- 1 vez por mes
- 2-3 veces al mes
- 1 vez por semana
- 2 veces por semana
- 3-4 veces por semana
- 5-6 veces por semana
- 1 vez por día
- 2 o más veces al día

¿Cuál fue el tamaño de porción habitual de brócoli de su hijo?

- Dash o pellizco (tamaño de un guisante)
- 1 cucharadita (tamaño de un dado)
- 1 cucharada (tamaño de una ficha de póker)
- 1 onza (volumen de un vasito para tragos)
- ¼ de taza (tamaño de una pelota de golf)
- ½ de taza (tamaño de una pelota de tenis)
- ¾ de taza (volumen en una taza de té)
- 1 taza (tamaño de una pelota de béisbol)

En los últimos 12 meses, ¿alguna vez originó de un casa o **jardín local**?

- Sí
- No

En los últimos 12 meses, ¿comió repollo su hijo?

- Sí
-

No

¿Con qué frecuencia comió repollo su hijo?

- 1-6 veces al año
- 7-11 veces al año
- 1 vez por mes
- 2-3 veces al mes
- 1 vez por semana
- 2 veces por semana
- 3-4 veces por semana
- 5-6 veces por semana
- 1 vez por día
- 2 o más veces al día

¿Cuál fue el tamaño de porción habitual de repollo de su hijo?

- Dash o pellizco (tamaño de un guisante)
- 1 cucharadita (tamaño de un dado)
- 1 cucharada (tamaño de una ficha de póker)
- 1 onza (volumen de un vasito para tragos)
- ¼ de taza (tamaño de una pelota de golf)
- ½ de taza (tamaño de una pelota de tenis)
- ¾ de taza (volumen en una taza de té)
- 1 taza (tamaño de una pelota de béisbol)

En los últimos 12 meses, ¿alguna vez originó de un casa o **jardín local**?

- Sí
-

No

En los últimos 12 meses, ¿comió papaya su hijo?

- Sí
- No

¿Con qué frecuencia comió papaya su hijo?

- 1-6 veces al año
- 7-11 veces al año
- 1 vez por mes
- 2-3 veces al mes
- 1 vez por semana
- 2 veces por semana
- 3-4 veces por semana
- 5-6 veces por semana
- 1 vez por día
- 2 o más veces al día

¿Cuál fue el tamaño de porción habitual de papaya de su hijo?

- Dash o pellizco (tamaño de un guisante)
- 1 cucharadita (tamaño de un dado)
- 1 cucharada (tamaño de una ficha de póker)
- 1 onza (volumen de un vasito para tragos)
- ¼ de taza (tamaño de una pelota de golf)
- ½ de taza (tamaño de una pelota de tenis)
- ¾ de taza (volumen en una taza de té)
-



1 taza (tamaño de una pelota de béisbol)

En los últimos 12 meses, ¿alguna vez originó de un casa o **jardín local**?

- Sí
- No

En los últimos 12 meses, ¿comió nabo su hijo?

- Sí
- No

¿Con qué frecuencia comió nabo su hijo?

- 1-6 veces al año
- 7-11 veces al año
- 1 vez por mes
- 2-3 veces al mes
- 1 vez por semana
- 2 veces por semana
- 3-4 veces por semana
- 5-6 veces por semana
- 1 vez por día
- 2 o más veces al día

¿Cuál fue el tamaño de porción habitual de nabo de su hijo?

- Dash o pellizco (tamaño de un guisante)
- 1 cucharadita (tamaño de un dado)
- 1 cucharada (tamaño de una ficha de póker)

- 1 onza (volumen de un vasito para tragos)
- ¼ de taza (tamaño de una pelota de golf)
- ½ de taza (tamaño de una pelota de tenis)
- ¾ de taza (volumen en una taza de té)
- 1 taza (tamaño de una pelota de béisbol)

En los últimos 12 meses, ¿alguna vez originó de un casa o **jardín local**?

- Sí
- No

En los últimos 12 meses, ¿comió coliflor su hijo?

- Sí
- No

¿Con qué frecuencia comió coliflor su hijo?

- 1-6 veces al año
- 7-11 veces al año
- 1 vez por mes
- 2-3 veces al mes
- 1 vez por semana
- 2 veces por semana
- 3-4 veces por semana
- 5-6 veces por semana
- 1 vez por día
- 2 o más veces por semana

¿Cuál fue el tamaño de porción habitual de coliflor de su hijo?

- Dash o pellizco (tamaño de un guisante)
- 1 cucharadita (tamaño de un dado)
- 1 cucharada (tamaño de una ficha de póker)
- 1 onza (volumen de un vasito para tragos)
- ¼ de taza (tamaño de una pelota de golf)
- ½ de taza (tamaño de una pelota de tenis)
- ¾ de taza (volumen en una taza de té)
- 1 taza (tamaño de una pelota de béisbol)

En los últimos 12 meses, ¿alguna vez originó de un casa o **jardín local**?

- Sí
- No

En los últimos 12 meses, ¿comió rúcula su hijo?

- Sí
- No

¿Con qué frecuencia comió rúcula su hijo?

- 1-6 veces al año
- 7-11 veces al año
- 1 vez por mes
- 2-3 veces al mes
- 1 vez por semana
- 2 veces por semana
- 3-4 veces por semana

—

- 5-6 veces por semana
- 1 vez por día
- 2 o más veces al día

¿Cuál fue el tamaño de porción habitual de rúcula de su hijo?

- Dash o pellizco (tamaño de un guisante)
- 1 cucharadita (tamaño de un dado)
- 1 cucharada (tamaño de una ficha de póker)
- 1 onza (volumen de un vasito para tragos)
- ¼ de taza (tamaño de una pelota de golf)
- ½ de taza (tamaño de una pelota de tenis)
- ¾ de taza (volumen en una taza de té)
- 1 taza (tamaño de una pelota de béisbol)

En los últimos 12 meses, ¿alguna vez originó de un casa o **jardín local**?

- Sí
- No

En los últimos 12 meses, ¿comió coles de Bruselas su hijo?

- Sí
- No

¿Con qué frecuencia comió coles de Bruselas su hijo?

- 1-6 veces al año
- 7-11 veces al año
- 1 vez por mes

- 2-3 veces al mes
- 1 vez por semana
- 2 veces por semana
- 3-4 veces por semana
- 5-6 veces por semana
- 1 vez por día
- 2 o más veces al día

¿Cuál fue el tamaño de porción habitual de coles de Bruselas de su hijo?

- Dash o pellizco (tamaño de un guisante)
- 1 cucharadita (tamaño de un dado)
- 1 cucharada (tamaño de una ficha de póker)
- 1 onza (volumen de un vasito para tragos)
- ¼ de taza (tamaño de una pelota de golf)
- ½ de taza (tamaño de una pelota de tenis)
- ¾ de taza (volumen en una taza de té)
- 1 taza (tamaño de una pelota de béisbol)

En los últimos 12 meses, ¿alguna vez originó de un casa o **jardín local**?

- Sí
- No

## **Amaranthaceae**

En los últimos 12 meses, ¿comió espinacas su hijo?

- Sí
- No

¿Con qué frecuencia comió espinacas su hijo?

- 1-6 veces al año
- 7-11 veces al año
- 1 vez por mes
- 2-3 veces al mes
- 1 vez por semana
- 2 veces por semana
- 3-4 veces por semana
- 5-6 veces por semana
- 1 vez por día
- 2 o más veces al día

¿Cuál fue el tamaño de porción habitual de espinacas de su hijo?

- Dash o pellizco (tamaño de un guisante)
- 1 cucharadita (tamaño de un dado)
- 1 cucharada (tamaño de una ficha de póker)
- 1 onza (volumen de un vasito para tragos)
- ¼ de taza (tamaño de una pelota de golf)
- ½ de taza (tamaño de una pelota de tenis)
- ¾ de taza (volumen en una taza de té)
- 1 taza (tamaño de una pelota de béisbol)

En los últimos 12 meses, ¿alguna vez originó de un casa o **jardín local**?

- Sí
- No

En los últimos 12 meses, ¿comió acelga suiza su hijo?

- Sí
- No

¿Con qué frecuencia comió acelga suiza su hijo?

- 1-6 veces por año
- 7-11 veces por año
- 1 vez por mes
- 2-3 veces al mes
- 1 vez por semana
- 2 veces por semana
- 3-4 veces por semana
- 5-6 veces por semana
- 1 vez por día
- 2 o más veces al día

¿Cuál fue el tamaño de porción habitual de acelga suiza de su hijo?

- Dash o pellizco (tamaño de un guisante)
- 1 cucharadita (tamaño de un dado)
- 1 cucharada (tamaño de una ficha de póker)
- 1 onza (volumen de un vasito para tragos)
- ¼ de taza (tamaño de una pelota de golf)
- ½ de taza (tamaño de una pelota de tenis)
- ¾ de taza (volumen en una taza de té)
- 1 taza (tamaño de una pelota de béisbol)

En los últimos 12 meses, ¿alguna vez originó de un casa o **jardín local**?

- Sí
- No

## **Cucurbitaceae**

En los últimos 12 meses, ¿comió calabaza su hijo?

- Sí
- No

¿Con qué frecuencia comió calabaza su hijo?

- 1-6 veces al año
- 7-11 veces al año
- 1 vez por mes
- 2-3 veces al mes
- 1 vez por semana
- 2 veces por semana
- 3-4 veces por semana
- 5-6 veces por semana
- 1 veces por día
- 2 o más veces al día

¿Cuál fue el tamaño de porción habitual de calabaza de su hijo?

- Dash o pellizco (tamaño de un guisante)
- 1 cucharadita (tamaño de un dado)
- 1 cucharada (tamaño de una ficha de póker)
- 1 onza (volumen de un vasito para tragos)



- ¼ de taza (tamaño de una pelota de golf)
- ½ de taza (tamaño de una pelota de tenis)
- ¾ de taza (volumen en una taza de té)
- 1 taza (tamaño de una pelota de béisbol)

En los últimos 12 meses, ¿alguna vez originó de un casa o **jardín local**?

- Sí
- No

En los últimos 12 meses, ¿comió zapallo su hijo?

- Sí
- No

¿Con qué frecuencia comió zapallo su hijo?

- 1-6 veces al año
- 7-11 veces al año
- 1 vez por mes
- 2-3 veces al mes
- 1 vez por semana
- 2 veces por semana
- 3-4 veces por semana
- 5-6 veces por semana
- 1 vez por día
- 2 o más veces al día

¿Cuál fue el tamaño de porción habitual de zapallo de su hijo?

- Dash o pellizco (tamaño de un guisante)
- 1 cucharadita (tamaño de un dado)
- 1 cucharada (tamaño de una ficha de póker)
- 1 onza (volumen de un vasito para tragos)
- ¼ de taza (tamaño de una pelota de golf)
- ½ de taza (tamaño de una pelota de tenis)
- ¾ de taza (volumen en una taza de té)
- 1 taza (tamaño de una pelota de béisbol)

En los últimos 12 meses, ¿alguna vez originó de un casa o **jardín local**?

- Sí
- No

En los últimos 12 meses, ¿comió pepino su hijo?

- Sí
- No

¿Con qué frecuencia comió pepino su hijo?

- 1-6 veces al año
- 7-11 veces al año
- 1 vez por mes
- 2-3 veces al mes
- 1 vez por semana
- 2 veces por semana
- 3-4 veces por semana
- 5-6 veces por semana
-

- 1 vez por día
- 2 o más veces al día

¿Cuál fue el tamaño de porción habitual de pepino de su hijo?

- Dash o pellizco (tamaño de un guisante)
- 1 cucharadita (tamaño de un dado)
- 1 cucharada (tamaño de una ficha de póker)
- 1 onza (volumen de un vasito para tragos)
- ¼ de taza (tamaño de una pelota de golf)
- ½ de taza (tamaño de una pelota de tenis)
- ¾ de taza (volumen en una taza de té)
- 1 taza (tamaño de una pelota de béisbol)

En los últimos 12 meses, ¿alguna vez originó de un casa o **jardín local**?

- Sí
- No

En los últimos 12 meses, ¿comió melón su hijo?

- Sí
- No

¿Con qué frecuencia comió melón su hijo?

- 1-6 veces al año
- 7-11 veces al año
- 1 vez por mes
- 2-3 veces por mes

- 1 vez por semana
- 2 veces por semana
- 3-4 veces por semana
- 5-6 veces por semana
- 1 vez por día
- 2 o más veces al día

¿Cuál fue el tamaño de porción habitual de melón de su hijo?

- Dash o pellizco (tamaño de un guisante)
- 1 cucharadita (tamaño de un dado)
- 1 cucharada (tamaño de una ficha de póker)
- 1 onza (volumen de un vasito para tragos)
- ¼ de taza (tamaño de una pelota de golf)
- ½ de taza (tamaño de una pelota de tenis)
- ¾ de taza (volumen en una taza de té)
- 1 taza (tamaño de una pelota de béisbol)

En los últimos 12 meses, ¿alguna vez originó de un casa o **jardín local**?

- Sí
- No

En los últimos 12 meses, ¿comió calabacín su hijo?

- Sí
- No

¿Con qué frecuencia comió calabacín su hijo?

- 1-6 veces al año
- 7-11 veces al año
- 1 vez por mes
- 2-3 veces al mes
- 1 vez por semana
- 2 veces por semana
- 3-4 veces por semana
- 5-6 veces por semana
- 1 vez por día
- 2 o más veces al día

¿Cuál fue el tamaño de porción habitual de calabacín de su hijo?

- Dash o pellizco (tamaño de un guisante)
- 1 cucharadita (tamaño de un dado)
- 1 cucharada (tamaño de una ficha de póker)
- 1 onza (volumen de un vasito para tragos)
- ¼ de taza (tamaño de una pelota de golf)
- ½ de taza (tamaño de una pelota de tenis)
- ¾ de taza (volumen en una taza de té)
- 1 taza (tamaño de una pelota de béisbol)

En los últimos 12 meses, ¿alguna vez originó de un casa o **jardín local**?

- Sí
- No

**Liliaceae**

En los últimos 12 meses, ¿comió ajo su hijo?

- Sí
- No

¿Con qué frecuencia comió ajo su hijo?

- 1-6 veces al año
- 7-11 veces al año
- 1 vez por mes
- 2-3 veces al mes
- 1 vez por semana
- 2 veces por semana
- 3-4 veces por semana
- 5-6 veces por semana
- 1 vez por día
- 2 o más veces al día

¿Cuál fue el tamaño de porción habitual de ajo para su hijo?

- 1 cucharada
- 1/2 cucharada
- 1 cucharadita
- 1/2 cucharadita
- 1/4 cucharadita
- 1/8 cucharadita

En los últimos 12 meses, ¿alguna vez originó de un casa o **jardín local**?

-

Sí

No

En los últimos 12 meses, ¿comió cebolla su hijo?

Sí

No

¿Con qué frecuencia comió cebollas su hijo?

1-6 veces al año

7-11 veces al año

1 vez por mes

2-3 veces al mes

1 vez por semana

2 veces por semana

3-4 veces por semana

5-6 veces por semana

1 vez por día

2 o más veces al día

¿Cuál fue el tamaño de porción habitual de cebolla de su hijo?

Dash o pellizco (tamaño de un guisante)

1 cucharadita (tamaño de un dado)

1 cucharada (tamaño de una ficha de póker)

1 onza (volumen de un vasito para tragos)

¼ de taza (tamaño de una pelota de golf)

½ de taza (tamaño de una pelota de tenis)

$\frac{3}{4}$  de taza (volumen en una taza de té)

1 taza (tamaño de una pelota de béisbol)

En los últimos 12 meses, ¿alguna vez originó de un casa o **jardín local**?

Sí

No

## Solanaceae

En los últimos 12 meses, ¿comió su hijo papas irlandesas?

Sí

No

¿Con qué frecuencia comió papas irlandesas su hijo?

1-6 veces al año

7-11 veces al año

1 vez por mes

2-3 veces al mes

1 vez por semana

2 veces por semana

3-4 veces por semana

5-6 veces por semana

1 vez por día

2 o más veces al día

¿Cuál fue el tamaño de porción habitual de papas irlandesas de su hijo?



- Dash o pellizco (tamaño de un guisante)
- 1 cucharadita (tamaño de un dado)
- 1 cucharada (tamaño de una ficha de póker)
- 1 onza (volumen de un vasito para tragos)
- ¼ de taza (tamaño de una pelota de golf)
- ½ de taza (tamaño de una pelota de tenis)
- ¾ de taza (volumen en una taza de té)
- 1 taza (tamaño de una pelota de béisbol)

En los últimos 12 meses, ¿alguna vez originó de un casa o **jardín local**?

- Sí
- No

En los últimos 12 meses, ¿comió tomates su hijo?

- Sí
- No

¿Con qué frecuencia comió tomates su hijo?

- 1-6 veces al año
- 7-11 veces al año
- 1 vez por mes
- 2-3 veces al mes
- 1 vez por semana
- 2 veces por semana
- 3-4 veces por semana
- 5-6 veces por semana
-

- 1 vez por día
- 2 o más veces al día

¿Cuál fue el tamaño de porción habitual de tomate de su hijo?

- Dash o pellizco (tamaño de un guisante)
- 1 cucharadita (tamaño de un dado)
- 1 cucharada (tamaño de una ficha de póker)
- 1 onza (volumen de un vasito para tragos)
- ¼ de taza (tamaño de una pelota de golf)
- ½ de taza (tamaño de una pelota de tenis)
- ¾ de taza (volumen en una taza de té)
- 1 taza (tamaño de una pelota de béisbol)

En los últimos 12 meses, ¿alguna vez originó de un casa o **jardín local**?

- Sí
- No

En los últimos 12 meses, ¿comió berenjena su hijo?

- Sí
- No

¿Con qué frecuencia comió berenjena su hijo?

- 1-6 veces al año
- 7-11 veces al año
- 1 vez al mes
- 2-3 veces al mes

- 1 vez por semana
- 2 veces por semana
- 3-4 veces por semana
- 5-6 veces por semana
- 1 vez por día
- 2 o más veces al día

¿Cuál fue el tamaño de porción habitual de berenjena de su hijo?

- Dash o pellizco (tamaño de un guisante)
- 1 cucharadita (tamaño de un dado)
- 1 cucharada (tamaño de una ficha de póker)
- 1 onza (volumen de un vasito para tragos)
- ¼ de taza (tamaño de una pelota de golf)
- ½ de taza (tamaño de una pelota de tenis)
- ¾ de taza (volumen en una taza de té)
- 1 taza (tamaño de una pelota de béisbol)

En los últimos 12 meses, ¿alguna vez originó de un casa o **jardín local**?

- Sí
- No

En los últimos 12 meses, ¿comió pimientos dulces su hijo?

- Sí
- No

¿Con qué frecuencia comió pimientos dulces su hijo?

- 1-6 veces al año
- 7-11 veces al año
- 1 vez por mes
- 2-3 veces al mes
- 1 vez por semana
- 2 veces por semana
- 3-4 veces por semana
- 5-6 veces por semana
- 1 vez por día
- 2 o más veces al día

¿Cuál fue el tamaño de porción habitual de pimientos dulces de su hijo?

- Dash o pellizco (tamaño de un guisante)
- 1 cucharadita (tamaño de un dado)
- 1 cucharada (tamaño de una ficha de póker)
- 1 onza (volumen de un vasito para tragos)
- ¼ de taza (tamaño de una pelota de golf)
- ½ de taza (tamaño de una pelota de tenis)
- ¾ de taza (volumen en una taza de té)
- 1 taza (tamaño de una pelota de béisbol)

En los últimos 12 meses, ¿alguna vez originó de un casa o **jardín local**?

- Sí
- No

**Apiaceae**

En los últimos 12 meses, ¿comió zanahorias su hijo?

- Sí
- No

¿Con qué frecuencia comió zanahorias su hijo?

- 1-6 veces al año
- 7-11 veces al año
- 1 vez por mes
- 2-3 veces al mes
- 1 vez por semana
- 2 veces por semana
- 3-4 veces por semana
- 5-6 veces por semana
- 1 vez por día
- 2 veces o más por día

¿Cuál fue el tamaño de porción habitual de zanahorias de su hijo?

- Dash o pellizco (tamaño de un guisante)
- 1 cucharadita (tamaño de un dado)
- 1 cucharada (tamaño de una ficha de póker)
- 1 onza (volumen de un vasito para tragos)
- ¼ de taza (tamaño de una pelota de golf)
- ½ de taza (tamaño de una pelota de tenis)
- ¾ de taza (volumen en una taza de té)
- 1 taza (tamaño de una pelota de béisbol)

En los últimos 12 meses, ¿alguna vez originó de un casa o **jardín local**?

- Sí
- No

En los últimos 12 meses, ¿comió apio su hijo?

- Sí
- No

¿Con qué frecuencia comió apio su hijo?

- 1-6 veces al año
- 7-11 veces al año
- 1 vez por mes
- 2-3 veces al mes
- 1 vez por semana
- 2 veces por semana
- 3-4 veces por semana
- 5-6 veces por semana
- 1 vez por día
- 2 o más veces al día

¿Cuál fue el tamaño de porción habitual de apio de su hijo?

- Dash o pellizco (tamaño de un guisante)
- 1 cucharadita (tamaño de un dado)
- 1 cucharada (tamaño de una ficha de póker)
- 1 onza (volumen de un vasito para tragos)
-

$\frac{1}{4}$  de taza (tamaño de una pelota de golf)

$\frac{1}{2}$  de taza (tamaño de una pelota de tenis)

$\frac{3}{4}$  de taza (volumen en una taza de té)

1 taza (tamaño de una pelota de béisbol)

En los últimos 12 meses, ¿alguna vez originó de un casa o **jardín local**?

Sí

No

En los últimos 12 meses, ¿comió cilantro fresco su hijo?

Sí

No

¿Con qué frecuencia comió cilantro fresco su hijo?

1-6 veces al año

7-11 veces al año

1 vez por mes

2-3 veces al mes

1 vez por semana

2 veces por semana

3-4 veces por semana

5-6 veces por semana

1 vez por día

2 veces o más por día

¿Cuál fue el tamaño de porción habitual de cilantro fresco de su hijo?

 3 leafs with stems (3 hojas con tallo)

 6 leafs with stems (6 hojas con tallo)

 9 leafs with stems (9 hojas con tallo)

 12 leafs with stems (12 hojas con tallo)

 15 leafs with stems (15 hojas con tallo)

En los últimos 12 meses, ¿alguna vez originó de un casa o **jardín local**?

Sí

No

## Fabaceae

En los últimos 12 meses, ¿comió frijoles rojos su hijo?

Sí

No

¿Con qué frecuencia comió frijoles rojos su hijo?

1-6 veces al año

7-11 veces al año

1 vez por mes

2-3 veces al mes

1 vez por semana

2 veces por semana

3-4 veces por semana

5-6 veces por semana



- 1 vez por día
- 2 o más veces al día

¿Cuál fue el tamaño de porción habitual de frijoles rojos de su hijo?

- Dash o pellizco (tamaño de un guisante)
- 1 cucharadita (tamaño de un dado)
- 1 cucharada (tamaño de una ficha de póker)
- 1 onza (volumen de un vasito para tragos)
- ¼ de taza (tamaño de una pelota de golf)
- ½ de taza (tamaño de una pelota de tenis)
- ¾ de taza (volumen en una taza de té)
- 1 taza (tamaño de una pelota de béisbol)

En los últimos 12 meses, ¿alguna vez originó de un casa o **jardín local**?

- Sí
- No

En los últimos 12 meses, ¿comió ejotes verdes su hijo?

- Sí
- No

¿Con qué frecuencia comió ejotes verdes su hijo?

- 1-6 veces al año
- 7-11 veces al año
- 1 vez por mes
- 2-3 veces al mes

- 1 vez por semana
- 2 veces por semana
- 3-4 veces por semana
- 5-6 veces por semana
- 1 vez por día
- 2 o más veces al día

¿Cuál fue el tamaño de porción habitual de ejotes verdes de su hijo?

- Dash o pellizco (tamaño de un guisante)
- 1 cucharadita (tamaño de un dado)
- 1 cucharada (tamaño de una ficha de póker)
- 1 onza (volumen de un vasito para tragos)
- ¼ de taza (tamaño de una pelota de golf)
- ½ de taza (tamaño de una pelota de tenis)
- ¾ de taza (volumen en una taza de té)
- 1 taza (tamaño de una pelota de béisbol)

En los últimos 12 meses, ¿alguna vez originó de un casa o **jardín local**?

- Sí
- No

En los últimos 12 meses, ¿comió habichuelas su hijo?

- Sí
- No

¿Con qué frecuencia comió habichuelas su hijo?

- 1-6 veces al año
- 7-11 veces al año
- 1 vez por mes
- 2-3 veces al mes
- 1 vez por semana
- 2 veces por semana
- 3-4 veces por semana
- 5-6 veces por semana
- 1 vez por día
- 2 o más veces al día

¿Cuál fue el tamaño de porción habitual de habichuelas de su hijo?

- Dash o pellizco (tamaño de un guisante)
- 1 cucharadita (tamaño de un dado)
- 1 cucharada (tamaño de una ficha de póker)
- 1 onza (volumen de un vasito para tragos)
- ¼ de taza (tamaño de una pelota de golf)
- ½ de taza (tamaño de una pelota de tenis)
- ¾ de taza (volumen en una taza de té)
- 1 taza (tamaño de una pelota de béisbol)

En los últimos 12 meses, ¿alguna vez originó de un casa o **jardín local**?

- Sí
- No

En los últimos 12 meses, ¿comió chícharos su hijo?

Sí

No

¿Con qué frecuencia comió chícharos su hijo?

1-6 veces al año

7-11 veces al año

1 vez por mes

2-3 veces al mes

1 vez por semana

2 veces por semana

3-4 veces por semana

5-6 veces por semana

1 vez por día

2 o más veces al día

¿Cuál fue el tamaño de porción habitual de chícharos de su hijo?

Dash o pellizco (tamaño de un guisante)

1 cucharadita (tamaño de un dado)

1 cucharada (tamaño de una ficha de póker)

1 onza (volumen de un vasito para tragos)

¼ de taza (tamaño de una pelota de golf)

½ de taza (tamaño de una pelota de tenis)

¾ de taza (volumen en una taza de té)

1 taza (tamaño de una pelota de béisbol)

En los últimos 12 meses, ¿alguna vez originó de un casa o **jardín local**?

- Sí
- No

En los últimos 12 meses, ¿comió habas su hijo?

- Sí
- No

¿Con qué frecuencia comió habas su hijo?

- 1-6 veces al año
- 7-11 veces al año
- 1 vez por mes
- 2-3 veces al mes
- 1 vez por semana
- 2 veces por semana
- 3-4 veces por semana
- 5-6 veces por semana
- 1 vez por día
- 2 o más veces al día

¿Cuál fue el tamaño de porción habitual de habas de su hijo?

- Dash o pellizco (tamaño de un guisante)
- 1 cucharadita (tamaño de un dado)
- 1 cucharada (tamaño de una ficha de póker)
- 1 onza (volumen de un vasito para tragos)
- ¼ de taza (tamaño de una pelota de golf)
- ½ de taza (tamaño de una pelota de tenis)
-

$\frac{3}{4}$  de taza (volumen en una taza de té)

1 taza (tamaño de una pelota de béisbol)

En los últimos 12 meses, ¿alguna vez originó de un casa o **jardín local**?

Sí

No

En los últimos 12 meses, ¿comió lentejas su hijo?

Sí

No

¿Con qué frecuencia comió lentejas su hijo?

1-6 veces al año

7-11 veces al año

1 vez por mes

2-3 veces al mes

1 vez por semana

2 veces por semana

3-4 veces por semana

5-6 veces por semana

1 vez por día

2 o más veces al día

¿Cuál fue el tamaño de porción habitual de lentejas de su hijo?

Dash o pellizco (tamaño de un guisante)

1 cucharadita (tamaño de un dado)

- 1 cucharada (tamaño de una ficha de póker)
- 1 onza (volumen de un vasito para tragos)
- ¼ de taza (tamaño de una pelota de golf)
- ½ de taza (tamaño de una pelota de tenis)
- ¾ de taza (volumen en una taza de té)
- 1 taza (tamaño de una pelota de béisbol)

En los últimos 12 meses, ¿alguna vez originó de un casa o **jardín local**?

- Sí
- No

En los últimos 12 meses, ¿comió frijoles de soya su hijo?

- Sí
- No

¿Con qué frecuencia comió frijoles de soya su hijo?

- 1-6 veces al año
- 7-11 veces al año
- 1 vez por mes
- 2-3 veces al mes
- 1 vez por semana
- 2 veces por semana
- 3-4 veces por semana
- 5-6 veces por semana
- 1 vez por día
- 2 o más veces al día

¿Cuál fue el tamaño de porción habitual de frijoles de soya de su hijo?

- Dash o pellizco (tamaño de un guisante)
- 1 cucharadita (tamaño de un dado)
- 1 cucharada (tamaño de una ficha de póker)
- 1 onza (volumen de un vasito para tragos)
- ¼ de taza (tamaño de una pelota de golf)
- ½ de taza (tamaño de una pelota de tenis)
- ¾ de taza (volumen en una taza de té)
- 1 taza (tamaño de una pelota de béisbol)

En los últimos 12 meses, ¿alguna vez originó de un casa o **jardín local**?

- Sí
- No

## **Lamiaceae**

En los últimos 12 meses, ¿comió albahaca fresca su hijo?

- Sí
- No

¿Con qué frecuencia comió albahaca fresca su hijo?

- 1-6 veces al año
- 7-11 veces al año
- 1 vez por mes
- 2-3 veces al mes
- 1 vez por semana



- 2 veces por semana
- 3-4 veces por semana
- 5-6 veces por semana
- 1 vez por día
- 2 o más veces al día

¿Cuál fue el tamaño de porción habitual de albahaca fresca de su hijo?

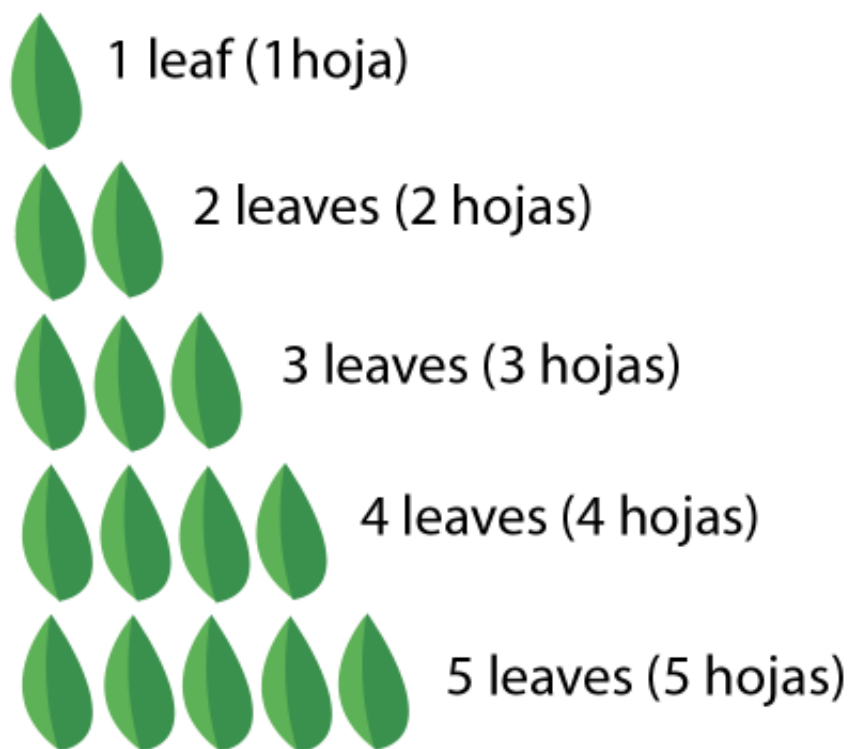

En los últimos 12 meses, ¿alguna vez originó de un casa o **jardín local**?

- Sí
- No

En los últimos 12 meses, ¿comió menta fresca su hijo?

- Sí
- No

¿Con qué frecuencia comió menta fresca su hijo?

- 1-6 veces al año
- 7-11 veces al año
- 1 vez por mes
- 2-3 veces al mes
- 1 vez por semana
- 2 veces por semana
- 3-4 veces por semana
- 5-6 veces por semana
- 1 vez por día
- 2 veces o más por día

¿Cuál era la porción habitual de menta de su hijo?

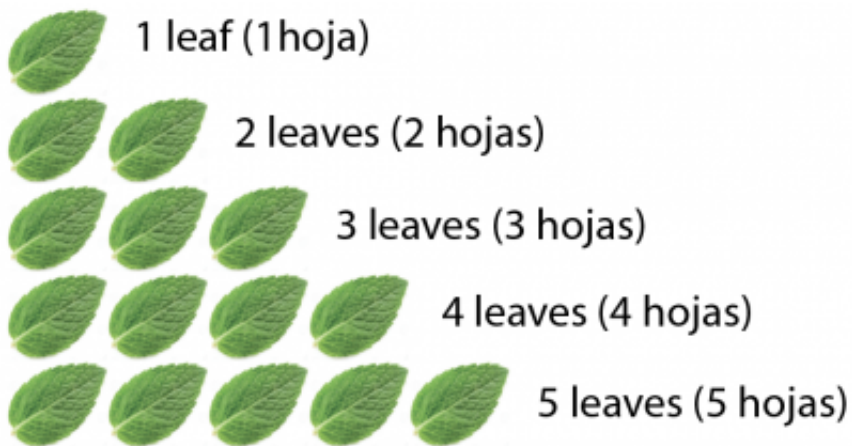

En los últimos 12 meses, ¿alguna vez originó de un casa o **jardín local**?

- Sí
- No

**Malvaceae**

En los últimos 12 meses, ¿comió okra su hijo?

- Sí
- No

¿Con qué frecuencia comió okra su hijo?

- 1-6 veces al año
- 7-11 veces al año
- 1 vez por mes
- 2-3 veces al mes
- 1 vez por semana
- 2-3 veces por semana
- 3-4 veces por semana
- 5-6 veces por semana
- 1 vez por día
- 2 o más veces al día

¿Cuál fue el tamaño de porción habitual de okra de su hijo?

- Dash o pellizco (tamaño de un guisante)
- 1 cucharadita (tamaño de un dado)
- 1 cucharada (tamaño de una ficha de póker)
- 1 onza (volumen de un vasito para tragos)
- ¼ de taza (tamaño de una pelota de golf)
- ½ de taza (tamaño de una pelota de tenis)
- ¾ de taza (volumen en una taza de té)
- 1 taza (tamaño de una pelota de béisbol)

En los últimos 12 meses, ¿alguna vez originó de un casa o **jardín local**?

- Sí
- No

## **Rosaceae**

En los últimos 12 meses, ¿comió manzanas su hijo?

- Sí
- No

¿Con qué frecuencia comió manzanas su hijo?

- 1-6 veces al año
- 7-11 veces al año
- 1 vez por mes
- 2-3 veces al mes
- 1 vez por semana
- 2 veces por semana
- 3-4 veces por semana
- 5-6 veces por semana
- 1 vez por día
- 2 o más veces al día

¿Cuál fue el tamaño de porción habitual de manzanas de su hijo?

- Dash o pellizco (tamaño de un guisante)
- 1 cucharadita (tamaño de un dado)
- 1 cucharada (tamaño de una ficha de póker)
- 1 onza (volumen de un vasito para tragos)

- ¼ de taza (tamaño de una pelota de golf)
- ½ de taza (tamaño de una pelota de tenis)
- ¾ de taza (volumen en una taza de té)
- 1 taza (tamaño de una pelota de béisbol)

En los últimos 12 meses, ¿alguna vez originó de casa o **lugar local**?

- Sí
- No

En los últimos 12 meses, ¿comió fresas su hijo?

- Sí
- No

¿Con qué frecuencia comió fresas su hijo?

- 1-6 veces al año
- 7-11 veces al año
- 1 vez por mes
- 2-3 veces al mes
- 1 vez por semana
- 2 veces por semana
- 3-4 veces por semana
- 5-6 veces por semana
- 1 vez por día
- 2 o más veces al día

¿Cuál fue el tamaño de porción habitual de fresas de su hijo?

- Dash o pellizco (tamaño de un guisante)
- 1 cucharadita (tamaño de un dado)
- 1 cucharada (tamaño de una ficha de póker)
- 1 onza (volumen de un vasito para tragos)
- ¼ de taza (tamaño de una pelota de golf)
- ½ de taza (tamaño de una pelota de tenis)
- ¾ de taza (volumen en una taza de té)
- 1 taza (tamaño de una pelota de béisbol)

En los últimos 12 meses, ¿alguna vez originó de un casa o **jardín local**?

- Sí
- No

## **Convolvulaceae**

En los últimos 12 meses, ¿comió batatas su hijo?

- Sí
- No

¿Con qué frecuencia comió batatas su hijo?

- 1-6 veces al año
- 6-7 veces al año
- 1 vez por mes
- 2-3 veces al mes
- 1 vez por semana
- 2 veces por semana
- 3-4 veces por semana

- 5-6 veces por semana
- 1 vez por día
- 2 o más veces al día

¿Cuál fue el tamaño de porción habitual de batatas de su hijo?

- Dash o pellizco (tamaño de un guisante)
- 1 cucharadita (tamaño de un dado)
- 1 cucharada (tamaño de una ficha de póker)
- 1 onza (volumen de un vasito para tragos)
- ¼ de taza (tamaño de una pelota de golf)
- ½ de taza (tamaño de una pelota de tenis)
- ¾ de taza (volumen en una taza de té)
- 1 taza (tamaño de una pelota de béisbol)

En los últimos 12 meses, ¿alguna vez originó de un casa o **jardín local**?

- Sí
- No

## Poaceae

En los últimos 12 meses, ¿comió maíz su hijo?

- Sí
- No

¿Con qué frecuencia comió maíz su hijo?

- 1-6 veces al año
-

- 7-11 veces al año
- 1 vez por mes
- 2-3 veces al mes
- 1 vez por semana
- 2 veces por semana
- 3-4 veces por semana
- 5-6 veces por semana
- 1 vez por día
- 2 o más veces al día

¿Cuál fue el tamaño de porción habitual de maíz de su hijo?

- Dash o pellizco (tamaño de un guisante)
- 1 cucharadita (tamaño de un dado)
- 1 cucharada (tamaño de una ficha de póker)
- 1 onza (volumen de un vasito para tragos)
- ¼ de taza (tamaño de una pelota de golf)
- ½ de taza (tamaño de una pelota de tenis)
- ¾ de taza (volumen en una taza de té)
- 1 taza (tamaño de una pelota de béisbol)

En los últimos 12 meses, ¿alguna vez originó de casa o **lugar local**?

- Sí
- No

En los últimos 12 meses, ¿comió arroz su hijo?

- Sí
-



No

¿Con qué frecuencia comió arroz su hijo?

- 1-6 veces al año
- 7-11 veces al año
- 1 vez por mes
- 2-3 veces al mes
- 1 vez por semana
- 2 veces por semana
- 3-4 veces por semana
- 5-6 veces por semana
- 1 vez por año
- 2 o más veces al año

¿Cuál fue el tamaño de porción habitual de arroz de su hijo?

- Dash o pellizco (tamaño de un guisante)
- 1 cucharadita (tamaño de un dado)
- 1 cucharada (tamaño de una ficha de póker)
- 1 onza (volumen de un vasito para tragos)
- ¼ de taza (tamaño de una pelota de golf)
- ½ de taza (tamaño de una pelota de tenis)
- ¾ de taza (volumen en una taza de té)
- 1 taza (tamaño de una pelota de béisbol)

En los últimos 12 meses, ¿alguna vez originó de casa o **lugar local**?

- Sí
-

No

En los últimos 12 meses, ¿comió su hijo productos de arroz (por ejemplo: cereal de arroz)?

- Sí
- No

Describe los productos de arroz que su hijo consumió.

¿Con qué frecuencia comió productos de arroz su hijo?

- 1-6 veces al año
- 7-11 veces al año
- 1 vez por mes
- 2-3 veces al mes
- 1 vez por semana
- 2 veces por semana
- 3-4 veces por semana
- 5-6 veces por semana
- 1 vez por día
- 2 o más veces al día

¿Cuál fue el tamaño de porción habitual de productos de arroz de su hijo?

- Dash o pellizco (tamaño de un guisante)
- 1 cucharadita (tamaño de un dado)
-

1 cucharada (tamaño de una ficha de póker)

- 1 onza (volumen de un vasito para tragos)
- ¼ de taza (tamaño de una pelota de golf)
- ½ de taza (tamaño de una pelota de tenis)
- ¾ de taza (volumen en una taza de té)
- 1 taza (tamaño de una pelota de béisbol)

En los últimos 12 meses, ¿alguna vez originó de casa o **lugar local**?

- Sí
- No

En los últimos 12 meses, ¿comió su hijo productos sin gluten que contienen lo siguiente:

- Quinoa
- Arroz integral
- Arroz salvaje
- Alforfón
- Sorgo
- Tapioca
- Mijo
- Amaranto
- Teff
- Arrurruz
- No

¿Cuál fue el tamaño de porción habitual de productos sin gluten de su hijo?

-

Dash o pellizco (tamaño de un guisante)

- 1 cucharadita (tamaño de un dado)
- 1 cucharada (tamaño de una ficha de póker)
- 1 onza (volumen de un vasito para tragos)
- ¼ de taza (tamaño de una pelota de golf)
- ½ de taza (tamaño de una pelota de tenis)
- ¾ de taza (volumen en una taza de té)
- 1 taza (tamaño de una pelota de béisbol)

En los últimos 12 meses, ¿alguna vez originó de casa o **lugar local**?

- Sí
- No

En los últimos 12 meses, ¿comió trigo integral su hijo?

- Sí
- No

¿Con qué frecuencia comió trigo integral su hijo?

- 1-6 veces al año
- 7-11 veces al año
- 1 vez por mes
- 2-3 veces al mes
- 1 vez por semana
- 2 veces por semana
- 3-4 veces por semana
- 5-6 veces por semana
-

- 1 vez por día
- 2 o más veces al día

¿Cuál fue el tamaño de porción habitual de trigo integral de su hijo?

- Dash o pellizco (tamaño de un guisante)
- 1 cucharadita (tamaño de un dado)
- 1 cucharada (tamaño de una ficha de póker)
- 1 onza (volumen de un vasito para tragos)
- ¼ de taza (tamaño de una pelota de golf)
- ½ de taza (tamaño de una pelota de tenis)
- ¾ de taza (volumen en una taza de té)
- 1 taza (tamaño de una pelota de béisbol)

En los últimos 12 meses, ¿alguna vez originó de casa o **lugar local**?

- Sí
- No

En los últimos 12 meses, ¿comió avena su hijo?

- Sí
- No

¿Con qué frecuencia comió avena su hijo?

- 1-6 veces al año
- 7-11 veces al año
- 1 vez por mes
- 2-3 veces al mes

- 1 vez por semana
- 2 veces por semana
- 3-4 veces por semana
- 5-6 veces por semana
- 1 vez por día
- 2 o más veces al día

¿Cuál fue el tamaño de porción habitual de avena de su hijo?

- Dash o pellizco (tamaño de un guisante)
- 1 cucharadita (tamaño de un dado)
- 1 cucharada (tamaño de una ficha de póker)
- 1 onza (volumen de un vasito para tragos)
- ¼ de taza (tamaño de una pelota de golf)
- ½ de taza (tamaño de una pelota de tenis)
- ¾ de taza (volumen en una taza de té)
- 1 taza (tamaño de una pelota de béisbol)

En los últimos 12 meses, ¿alguna vez originó de casa o **lugar local**?

- Sí
- No

### **Selfish and seafood**

En los últimos 12 meses, ¿comió mariscos su hijo (vieiras, almejas, ostras, mejillones, cangrejo, langosta)?

- Sí
- No

¿Con qué frecuencia comió mariscos su hijo (vieiras, almejas, ostras, mejillones, cangrejo, langosta)?

- 1-6 veces por año
- 7-11 veces por año
- 1 vez por mes
- 2-3 veces por mes
- 1 vez por semana
- 2 veces por semana
- 3-4 veces por semana
- 5-6 veces por semana
- 1 vez al día
- 2 o más veces al día

¿Cuál fue el tamaño de porción habitual de mariscos de su hijo?

- Dash o pellizco (tamaño de un guisante)
- 1 cucharadita (tamaño de un dado)
- 1 cucharada (tamaño de una ficha de póker)
- 1 onza (volumen de un vasito para tragos)
- ¼ de taza (tamaño de una pelota de golf)
- ½ de taza (tamaño de una pelota de tenis)
- ¾ de taza (volumen en una taza de té)
- 1 taza (tamaño de una pelota de béisbol)

En los últimos 12 meses, ¿el origen fue capturada localmente?

- Sí
- No

En los últimos 12 meses, ¿comió algas marinas su hijo?

- Sí
- No

¿Con qué frecuencia comió algas marinas su hijo?

- 1-6 veces por año
- 7-11 veces por año
- 1 vez por mes
- 2-3 veces por mes
- 1 vez por semana
- 2 veces por semana
- 3-4 veces por semana
- 5-6 veces por semana
- 1 vez al día
- 2 o más veces al día

¿Cuál fue el tamaño de porción habitual de algas marinas de su hijo?

- Dash o pellizco (tamaño de un guisante)
- 1 cucharadita (tamaño de un dado)
- 1 cucharada (tamaño de una ficha de póker)
- 1 onza (volumen de un vasito para tragos)
- ¼ de taza (tamaño de una pelota de golf)
- ½ de taza (tamaño de una pelota de tenis)
- ¾ de taza (volumen en una taza de té)
- 1 taza (tamaño de una pelota de béisbol)



En los últimos 12 meses, ¿el origen fue capturada localmente?

- Sí
- No

## **Baby food**

En los últimos 12 meses, ¿comió su hijo comida orgánica para bebés?

- Sí
- No

¿Con qué frecuencia comió comida orgánica para bebés?

- 1-6 veces al año
- 7-11 veces al año
- 1 vez por mes
- 2-3 veces al mes
- 1 vez por semana
- 2 veces por semana
- 3-4 veces por semana
- 5-6 veces por semana
- 1 vez al día
- 2 o más veces al día

¿Cuál era el tamaño de porción habitual de comida orgánica para bebés de su hijo?

- 1/4 taza = 2 onzas
- 1/2 taza = 4 onzas
- 3/4 taza = 6 onzas

- 1 taza = 8 onzas
- 1 1/4 tazas = 10 onzas
- 1 1/2 tazas = 12 onzas
- 1 3/4 tazas = 14 onzas
- 2 tazas = 16 onzas

En los últimos 12 meses, ¿el origen de los ingredientes para la comida para bebés de su hijo fue de su casa o algún jardín local?

- Sí
- No

## Apple Juice

En los últimos 12 meses, ¿tomó jugo de manzana su hijo?

- Sí
- No

¿Con qué frecuencia tomó jugo de manzana su hijo?

- NUNCA
- 1 vez por mes o menos
- 2-3 veces por mes
- 1-2 veces por semana
- 3-4 veces por semana
- 5-6 veces por semana
- 1 vez por día
- 2-3 veces por día
-

4-5 veces por día

6 o más veces al día

¿Cuál era el tamaño de porción habitual de jugo de manzana de su hijo?

1/4 taza = 2 onzas

1/2 taza = 4 onzas

3/4 taza = 6 onzas

1 taza = 8 onzas

1 1/4 tazas = 10 onzas

1 1/2 tazas = 12 onzas

1 3/4 tazas = 14 onzas

2 tazas = 16 onzas

## Water

En los últimos 12 meses, ¿con qué frecuencia bebió agua del grifo su hijo?

NUNCA

1 vez por mes o menos

2-3 veces al mes

1-2 veces por semana

3-4 veces por semana

5-6 veces por semana

1 vez por día

2-3 veces al día

4-5 veces al día

6 o más veces al día

¿Cuál era el tamaño de porción habitual de agua del grifo de su hijo?

- 1/4 taza = 2 onzas
- 1/2 taza = 4 onzas
- 3/4 taza = 6 onzas
- 1 taza = 8 onzas
- 1 1/4 tazas = 10 onzas
- 1 1/2 tazas = 12 onzas
- 1 3/4 tazas = 14 onzas
- 2 tazas = 16 onzas

En los últimos 12 meses, cuando su hijo bebió agua del grifo, ¿cuál fue el origen principal?

- fuente de agua de la comunidad
- Un pozo o agua de lluvia
- Un río
- No lo sé
- Otro

En los últimos 12 meses, ¿con qué frecuencia bebió agua embotellada su hijo?

- NUNCA
- 1 vez por mes o menos
- 2-3 veces al mes
- 1-2 veces por semana
- 3-4 veces por semana
- 5-6 veces por semana
- 1 vez por día

- 2-3 veces al día
- 4-5 veces al día
- 6 o más veces al día

## End of Survey Questions

¿Qué fácil fue completar este cuestionario de frecuencia de alimentos?

Extremadamente Moderadamente Un poco Ni fácil Un poco Moderadamente Extremadamente  
facil fácil facil ni difícil difícil difícil difícil

¿Qué tan probable es que participes en futuras evaluaciones dietéticas?

extremadamente Moderadamente Poco Ni Ligeramente Moderadamente Extremadamer  
probable probable probable improbable improbable improbable improbable
